# Supplementary material for: Needs and rights awareness of stroke survivors and caregivers: a cross-sectional, single-centre questionnaire survey
Source: PubMed Central journal article supplement — BMJ Open. 2017 Oct 5;7(10):e013210. doi: 10.1136/bmjopen-2016-013210 (PMC5640053; doi:10.1136/bmjopen-2016-013210), 2017-10-05
Supplement: bmjopen-2016-013210.draft_revisions.pdf [file bmjopen-2016-013210.draft_revisions.pdf]

# BMJ Open

## Needs and rights awareness of stroke survivors and caregivers: a survey in China

|                                 |                                                                                                                                                                                                                                                                                                                                                                                                                                                                                                                                                                                                                       |
|---------------------------------|-----------------------------------------------------------------------------------------------------------------------------------------------------------------------------------------------------------------------------------------------------------------------------------------------------------------------------------------------------------------------------------------------------------------------------------------------------------------------------------------------------------------------------------------------------------------------------------------------------------------------|
| Journal:                        | <i>BMJ Open</i>                                                                                                                                                                                                                                                                                                                                                                                                                                                                                                                                                                                                       |
| Manuscript ID                   | bmjopen-2016-013210                                                                                                                                                                                                                                                                                                                                                                                                                                                                                                                                                                                                   |
| Article Type:                   | Research                                                                                                                                                                                                                                                                                                                                                                                                                                                                                                                                                                                                              |
| Date Submitted by the Author:   | 28-Jun-2016                                                                                                                                                                                                                                                                                                                                                                                                                                                                                                                                                                                                           |
| Complete List of Authors:       | Li, Xin; The Second Hospital of Tianjin Medical University, Tianjin, China , Neurology<br>Xia, Xiaoshuang; The Second Hospital of Tianjin Medical University, Tianjin, China , Neurology<br>Wang, Peilu; The Second Hospital of Tianjin Medical University, Tianjin, China , Neurology<br>Zhang, Shuting; Stroke Clinical Research Unit; West China Hospital, Sichuan University, Chengdu, China, Neurology<br>Liu, M; Stroke Clinical Research Unit; West China Hospital, Sichuan University, Chengdu, China, Neurology<br>Wang, Lin; The Second Hospital of Tianjin Medical University, Tianjin, China , Geratology |
| <b>Primary Subject Heading</b>: | Neurology                                                                                                                                                                                                                                                                                                                                                                                                                                                                                                                                                                                                             |
| Secondary Subject Heading:      | Public health, Patient-centred medicine, Mental health, Medical education and training                                                                                                                                                                                                                                                                                                                                                                                                                                                                                                                                |
| Keywords:                       | needs, patients rights, Stroke < NEUROLOGY, caregivers, survey                                                                                                                                                                                                                                                                                                                                                                                                                                                                                                                                                        |
|                                 |                                                                                                                                                                                                                                                                                                                                                                                                                                                                                                                                                                                                                       |

SCHOLARONE™  
Manuscripts

# Needs and rights awareness of stroke survivors and caregivers: a survey in China

Xin Li,<sup>1</sup> Xiaoshuang Xia,<sup>1</sup> Peilu Wang,<sup>1</sup> Shuting Zhang,<sup>2</sup> Ming Liu,<sup>2</sup> Lin Wang<sup>3</sup>

<sup>1</sup>From Department of Neurology, The Second Hospital of Tianjin Medical University, Tianjin, China

<sup>2</sup>From Stroke Clinical Research Unit, Department of Neurology, West China Hospital, Sichuan University, Chengdu, China

<sup>3</sup>Department of Geratology, The Second Hospital of Tianjin Medical University and Tianjin Geriatric Institute, Tianjin, China

Correspondence to:

Xin Li, MD, PhD, Department of Neurology, The Second Hospital of Tianjin Medical University, No 22, Pingjiang Road, Hexi District, Tianjin 300211, China, [lixin@126.com](mailto:lixin@126.com) or Ming Liu, MD, PhD, Stroke Clinical Research Unit, Department of Neurology, West China Hospital, Sichuan University, No 37, Guo Xue Xiang, Chengdu 610041, China, [wypmh@hotmail.com](mailto:wypmh@hotmail.com),

Key words: needs, patient rights, stroke, caregivers, survey

Word count: 4739

## ABSTRACT

**Objectives:** The needs and rights awareness of stroke survivors have not been reported in China. This study investigated the needs and rights awareness in current Chinese stroke survivors and caregivers.

**Setting:** A survey launched by the World Stroke Organization (WSO) was conducted in Tianjin China. The questionnaire included demands of psychological support, treatment and care, social support, and information. Stroke survivors and their caregivers were interviewed face to face for the questionnaire. From June 2014 to February 2015, stroke survivors were invited to participate if they were over 18 years old, had suffered a stroke. Exclusion criteria were patients who had disorders of consciousness, significant cognitive impairment, aphasia, communication difficulties, or psychiatric disorders. Only caregivers who were family members of the patients were chosen. Paid caregivers were excluded.

**Participants:** 248 stroke survivors and 212 caregivers were enrolled.

**Primary outcome measures:** The correlations between levels of needs and potential effect factors were analyzed. Levels of different needs were compared by age, gender, and time since stroke.

**Results:** 248 stroke survivors and 212 caregivers completed the survey. 95.6% stroke survivors and 92.5% caregivers approved of each question listed in the questionnaire. The participants prioritized the needs for psychology support (99.4%), treatment and care(98.6%), social support (98%) and information (96.2%). The total score was negatively correlated with age ( $r=-0.255$ ,  $P<0.01$ ). The patients under 65 years old had higher scores than the elderly (65 years or older) ( $P<0.01$ ), while the male patients also got higher scores than the female

1  
2  
3  
4 patients ( $P<0.01$ ).

5  
6 **Conclusions:** The demands of psychological and emotional support, individual treatment,  
7  
8 social support and information were eagerly reported by most stroke survivors. The Bill of  
9  
10 Rights is also needed to be recognized by the society in China, providing an appropriate  
11  
12 stroke care to every patient for optimizing stroke outcomes.  
13  
14

### 15 16 **Strengths and limitations of this study**

- 17  
18 ■ Stroke survivors and caregivers do not have their own bill of rights when this study was  
19  
20 performed, and their needs and rights awareness have not been reported in China.  
21  
22
- 23  
24 ■ The demands of psychological and emotional support, individual treatment, social  
25  
26 support and information were eagerly reported by most stroke survivors.  
27  
28
- 29  
30 ■ The stroke survivors in China had strongest demand for emotional and psychological  
31  
32 support, which should be recognized.  
33
- 34  
35 ■ Limitations include potential bias due to severe language or cognitive impairment  
36  
37 patients excluded. And the number of participants was limited. Further multiple central  
38  
39 and large sample research studies may be needed in the future.  
40  
41  
42

### 43 44 **INTRODUCTION**

45  
46 Stroke is a major cause of death and disability worldwide. The burden of stroke is  
47  
48 particularly serious in Asia[1], and its mortality is higher than that in Europe or North  
49  
50 America[2]. In China, it is the leading cause of death and disability[3]. Stroke survivors cope  
51  
52 with significant physical, cognitive, and emotional deficits, and 25% to 74% of these  
53  
54 survivors require some assistance or are fully dependent on caregivers for activities of daily  
55  
56  
57  
58  
59  
60

1  
2  
3  
4 living[4]. Although much has been done to control the disease, the stroke survivors' needs  
5  
6 and rights have not received adequate attention. Bills of patient rights for several diseases  
7  
8 have been developed to achieve higher degrees of patient satisfaction, such as for cancer[5]  
9  
10 and Chronic Obstructive Pulmonary Disease (COPD)[6]. Stroke survivors didn't have their  
11  
12 own bill of rights, until the World Stroke Organization (WSO) have realized this urgent need  
13  
14 and framed a global bill of rights for stroke patients[7]. WSO have numerous strategies in  
15  
16 increasing stroke awareness, influencing policies for stroke prevention and improved health  
17  
18 services, providing education and fostering the development of systems and organizations for  
19  
20 the long-term support of stroke survivors and their families[8]. To determine what stroke  
21  
22 survivors and caregivers require, the WSO has launched an online survey.  
23  
24  
25  
26  
27

28  
29 This survey was used to investigate the needs and rights awareness in Chinese stroke  
30  
31 survivors and caregivers. This study was aimed to provide a reference for the improvement of  
32  
33 stroke-related laws and bills, which could provide the stroke survivor with physical, mental  
34  
35 and emotional support.  
36  
37

## 38 ***METHODS***

### 39 ***Study population***

40  
41  
42 This study was approved by our local Ethics Committee in the Second Hospital of  
43  
44 Tianjin Medical University. All the patients and caregivers gave informed consent.  
45  
46  
47

48  
49 From June 2014 to February 2015, 248 stroke survivors and 212 caregivers at the  
50  
51 Department of Neurology of the Second Hospital of Tianjin Medical University were enrolled.  
52  
53 Stroke survivors were invited to participate if they were over 18 years old, had suffered a  
54  
55 stroke, and agreed to participate in the study. Exclusion criteria were patients who had  
56  
57  
58  
59  
60

1  
2  
3 disorders of consciousness, significant cognitive impairment, aphasia, communication  
4  
5  
6 difficulties, or psychiatric disorders.  
7

8  
9 Caregivers who had been taking care of the stroke patients met the above criteria were  
10  
11 recruited. Only caregivers who were family members of the patients were chosen. Paid  
12  
13 caregivers were excluded.  
14

### 15 16 *Development of the survey*

17  
18 The questionnaire was adapted from one designed by the WSO. Stroke survivors and  
19  
20 caregivers were interviewed face to face by well-trained neurologists who were not the  
21  
22 patients' treating doctors.  
23  
24

25  
26 The final questionnaire included 17 questions covering: age, gender, level of education,  
27  
28 time since the first stroke, demands of treatment and information about stroke, psychological  
29  
30 and social support. Fourteen of the questions had five choices for each question. The five  
31  
32 choices were strongly agree, agree, neutral, disagree and strongly disagree. The purpose of  
33  
34 the survey and the procedure was explained fully to all participants.  
35  
36  
37

38  
39 The questionnaire translated to Chinese was tested again for the reliability in our  
40  
41 population. The scales reliability of the stroke survivors' questionnaire was assessed with a  
42  
43 total Cronbach's  $\alpha$  of 0.910, corrected by inter-item correlation above 0.70. The scales  
44  
45 reliability of the stroke caregivers' questionnaire was assessed with a total Cronbach's  $\alpha$  of  
46  
47 0.817, corrected by inter-item correlation f above 0.70. The Cronbach's  $\alpha$  values were good  
48  
49 for all scales for the study.  
50  
51

### 52 53 *Statistical Analysis*

54  
55  
56 Frequencies and proportions were used to summarize levels of answers. The Spearman  
57  
58  
59  
60

Rank Relational Coefficient was used to analyze the correlations between levels of needs and potential effect factors. Levels of different needs were compared by age, gender, and time since stroke. Comparisons between groups were made using the Mann–Whitney *U* test. Statistical tests were performed at the 95% confidence level.

## RESULTS

### Study population

The descriptive characteristics of stroke survivors and caregivers were summarized in Table 1.

248 stroke survivors included 123 women and 125 men between the ages of 33 and 92 with a mean age of 69.5. 170 (68.5%) patients had experienced their first stroke within one year. 115(46.4%) patients had been educated for more than 9 years.

212 caregivers included 117 women and 95 men between the ages of 20 and 88 with a mean age of 52.6. Stroke survivors they cared for were aged between 45 and 92 years with a mean age of 72.2. The duration of care for 132 (62.3%) of the patients was less than one year. 141(66.5%) caregivers had been educated for more than 9 years.

**Table 1 Characteristic of stroke survivors and caregivers**

|       | Stroke Survivors | Stroke Caregivers |
|-------|------------------|-------------------|
|       | N(%)             | N(%)              |
| Total | 248              | 212               |
| Age   |                  |                   |
| <45   | 3(1.2%)          | 49(23.1%)         |
| 45-54 | 29(11.7%)        | 69(32.5%)         |
| 55-64 | 54(21.8%)        | 65(30.7%)         |

|                   |        |            |             |
|-------------------|--------|------------|-------------|
|                   | 65-74  | 63(25.4%)  | 21(9.9%)    |
|                   | 75-84  | 73(29.4%)  | 5(2.4%)     |
|                   | ≥85    | 26(10.5%)  | 3(1.4%)     |
| Gender            |        |            |             |
|                   | Male   | 125(50.4%) | 95(44.8%)   |
|                   | Female | 123(49.6%) | 117 (55.2%) |
| Time since stroke |        |            |             |
|                   | <1y    | 170(68.5%) | 132 (62.3%) |
|                   | 1-3y   | 41(16.5%)  | 37(17.5%)   |
|                   | 4-7y   | 13(5.2%)   | 22(10.4%)   |
|                   | 8-10y  | 6(2.4%)    | 8(3.8%)     |
|                   | >10y   | 18(7.3%)   | 13(6.1%)    |
| Education         |        |            |             |
|                   | <3y    | 19(7.7%)   | 2(0.9%)     |
|                   | 3-6y   | 44(17.7%)  | 13(6.1%)    |
|                   | 6-9y   | 70(28.2%)  | 56(26.4%)   |
|                   | 9-12y  | 88(35.5%)  | 93(43.9%)   |
|                   | >12y   | 27(10.9%)  | 48(22.6%)   |

95.6% of the stroke survivors approved of each question listed in the questionnaire. The right to receive treatment by a specialized team at all the stages of the disease, as well as psychology support was mostly favored by the stroke survivors (99.6%). The next most common demand was the right to receive treatment as an individual, taking into consideration their age, gender, culture and changing needs over time (99.2%).

The total score was negatively correlated with age ( $r=-0.255$ ,  $P<0.01$ ) and gender ( $r=-0.14$ ,  $P=0.027$ ). Weighing the total score of all questions, the patients under 65 years old scored higher than the older (65 years or older) ( $P<0.001$ ), while male patients got higher scores than female patients ( $P=0.027$ ). There were no differences in the total scores



1  
2  
3  
4 based on level of education ( $P=0.434$ ) and time since first stroke ( $P=0.588$ ).  
5

6 All the needs in the questionnaire were divided into needs for psychological support,  
7  
8 treatment and care, social support and information. The results of the survey showed the  
9  
10 participants prioritized the needs for psychology supports (99.4%), treatment and  
11  
12 care(98.6%), social support (98%) and information (96.2%).  
13  
14

### 15 ***Psychological support***

16  
17  
18 More than 99% of stroke survivors reported the need for psychological and emotional  
19  
20 support. Scores for physiological needs were higher in patients under 65 years old ( $P<0.001$ ),  
21  
22 as well as in male stroke survivors ( $P=0.004$ ). There was no difference in the request for  
23  
24 psychological needs based on the level of education ( $P=0.420$ ) or time since first stroke  
25  
26 ( $P=0.466$ ).  
27  
28  
29

### 30 ***Needs for treatment and care***

31  
32  
33 Over 98% of stroke survivors reported the needs for diagnosis, treatment, care and  
34  
35 rehabilitation. 99.6% of patients prioritized the need for treatment by a specialized team at all  
36  
37 stages of their journey (in hospital and during rehabilitation). The next most common request  
38  
39 of stroke survivors, at 98.8%, was the need of individual treatment based on their age, gender,  
40  
41 culture, goals and changing needs over time. Patients under 65 years old had greater needs  
42  
43 related to stroke treatment and care than those 65 years or older ( $P=0.002$ ). Male patients had  
44  
45 higher scores than female patients ( $P=0.041$ ). There was no difference between needs related  
46  
47 to treatment and education ( $P=0.408$ ) or time since first stroke ( $P=0.474$ ).  
48  
49  
50  
51  
52

### 53 ***Social support***

54  
55  
56 98% of stroke survivors had the will to connect with other stroke survivors to gain and  
57  
58  
59  
60

1  
2  
3  
4 provide support in recovery from stroke. Although stroke survivors suffered from different  
5  
6 disabilities, 97.6% of them still want to participant in all aspects of society. Financial or other  
7  
8 forms of social support for longer-term care was also demanded by 97.6% stroke survivors.  
9  
10 The scores of needs related to social participation and support in stroke survivors under 65  
11  
12 were higher than those of 65years or older ( $P<0.001$ ). The male patients got higher scores  
13  
14 than female patients ( $P=0.045$ ). There was no difference between social needs and education  
15  
16 ( $P=0.963$ ) or time since first stroke( $P=0.652$ ).  
17  
18  
19

### 20 21 ***Information needs*** 22

23  
24 97.6% of stroke survivors reported wanting information about what had happened and  
25  
26 living with stroke, while 94.8% of stroke survivors reported wanting information about the  
27  
28 signs of stroke. As with the other needs, information needs in patients under 65 were greater  
29  
30 than those 65 years or older ( $P<0.001$ ). Unlike other needs, the desire to be fully informed  
31  
32 about what has happened and about living with stroke was positively correlated with  
33  
34 education level ( $P=0.04$ ). There was no difference between information needs and gender  
35  
36 ( $P=0.311$ ) or time since first stroke ( $P=0.348$ ).  
37  
38  
39

### 40 41 ***Caregivers' opinion*** 42

43  
44 92.5% of caregivers approved of each question listed in the questionnaire. Timely  
45  
46 diagnosis and treatment appeared to be uppermost in caregivers' minds (99.1%). They also  
47  
48 cared about financial support to aid in the patient's recovery (98.6%). The total score of  
49  
50 caregivers was negatively correlated with the age of the caregivers ( $r=-0.197$ ,  $P=0.004$ ),  
51  
52 while positively correlated with levels of education ( $r=2.259$ ,  $P<0.001$ ). No correlation was  
53  
54 found between the scores and gender or time that the patients they cared for experienced their  
55  
56  
57  
58  
59  
60

1  
2  
3  
4 first stroke ( $P>0.05$ ).  
5

## 6 ***DISCUSSION*** 7

8  
9 In this study, 95.6% stroke survivors and 92.5% of caregivers approved of each question,  
10 which showed that most patients were eager for a formal declaration of their rights. The  
11 participants prioritized the needs for psychology support (99.4%), treatment and care (98.6%),  
12 social support (98%) and information (96.2%). The Global Stroke Bill of Rights developed  
13 by the World Stroke Organization, which sets out the right of each stroke survivor to: receive  
14 the best stroke care, be informed and prepared, be supported in their recovery[9].  
15  
16  
17  
18  
19  
20  
21  
22  
23

### 24 ***The factors influencing the awareness of needs and rights*** 25

26 This survey showed that patients under 65 years old had more needs than those 65 years  
27 or older. The needs and awareness of rights were negatively correlated with the age of the  
28 patients. Because of different social and domestic duties between the younger and the older,  
29 the younger yearned for a higher quality of life after stroke. They seemed keener on requiring  
30 knowledge of stroke, appropriate therapies, as well as emotional and social support. In China,  
31 the older population's beliefs were more likely to follow traditional Chinese ideas and not  
32 demand much, while the younger population had a stronger awareness of their rights. This  
33 result did not match the findings of similar survey conducted in the UK[10], which had  
34 reported that there was no relationship between needs and age. In our survey, this cultural  
35 difference between the generations might be the cause of the different results. Patients over  
36 65 age constitute 47.5% of the subjects in the British survey, while in this survey, 65.3% of  
37 the patients were above 65 years old. Also unlike other surveys, this survey found that male  
38 patients had a stronger demand and were more conscious of their rights. This phenomenon  
39  
40  
41  
42  
43  
44  
45  
46  
47  
48  
49  
50  
51  
52  
53  
54  
55  
56  
57  
58  
59  
60

1  
2  
3  
4 could be due to the traditional thought of "male superiority to female" in Chinese tradition  
5  
6 society.  
7

8  
9 Our study is consistent with the UK study[10], where no significant correlation was  
10  
11 found between the total scores and levels of education. There was also no correlation between  
12  
13 the needs and the time since the first stroke. Similarly, Walsh et al[11] found no significant  
14  
15 difference in time since stroke between those who reported multiple unmet needs and those  
16  
17 who reported one or no unmet needs.  
18  
19

### 20 21 *Psychological support* 22

23  
24 As is shown in our results, the questions related to psychological needs got the highest  
25  
26 score and the highest support rate, suggesting that the stroke survivors in China had strongest  
27  
28 demand for emotional and psychological support. A sudden attack and poor prognosis had an  
29  
30 appreciable effect on the psychology of stroke survivors. Some surveys have demonstrated  
31  
32 that emotional problems among stroke survivors would be prejudicial to the treatment and  
33  
34 rehabilitation after stroke[12-14]. As a doctor, we usually pay more attention to the therapy of  
35  
36 disease rather than the emotional needs of the patients. A national survey carried out in  
37  
38 Ireland showed that 77% of respondents suffered from emotional problems after stroke, while  
39  
40 only 10% of the respondents had received community psychological service[11]. Since  
41  
42 emotional and psychological needs are liable to be neglected, post-stroke depression was a  
43  
44 common complication after stroke, which seriously impairs quality of life[15 16].  
45  
46 Psychological support has been gradually recognized, and recommended in the newest  
47  
48 version of the Chinese Stroke Guidelines in particular. The results in this study remind us that  
49  
50 psychological needs of stroke survivors shouldn't be ignored, and we should provide more  
51  
52  
53  
54  
55  
56  
57  
58  
59  
60

1  
2  
3  
4 psychological and emotional support to our patients, which is essential for their recovery and  
5  
6 rehabilitation.  
7

### 8 *Needs for treatment and care*

9  
10  
11 The needs for diagnosis, treatment, care and rehabilitation were second only to the  
12  
13 need for psychological support. Patients were anxious for individualized treatment by a  
14  
15 specialized team, taking into consideration their age, gender, culture, goals and changing  
16  
17 needs over time. The strategies should vary depending on the cause, pathophysiological  
18  
19 mechanisms, severity and prognosis to reduce the risk of a recurrent event[17]. Patient's  
20  
21 individual risk should be assessed, such as those with atrial fibrillation, then antithrombotic  
22  
23 therapy oral anticoagulation may be needed for effective stroke prevention[18]. Most stroke  
24  
25 survivors suffer from different residual deficits; individualized and optimized care is also  
26  
27 needed during inpatient and in chronic care and end-of-life settings[4]. As stroke is an  
28  
29 emergency and disastrous disease, a timely and appropriate diagnosis and therapy made by  
30  
31 specialized neurologists is vital to the survival and recovery of the patients. A well-organized  
32  
33 continuing medical education system covering stroke for community doctors and  
34  
35 non-neurologists should be established in China[19], as well as a stroke services system in  
36  
37 accordance with World Stroke Organization Global Stroke Services Guidelines and Action  
38  
39 Plan[20] which remind us stroke awareness, education, prevention, and treatment should  
40  
41 always be feasible.  
42  
43  
44  
45  
46  
47  
48  
49

### 50 *Social support*

51  
52  
53 In this research, the stroke survivors exhibited their desire to return to the full range of  
54  
55 activities and roles they had before their stroke, playing an active role in their own lives and  
56  
57  
58  
59  
60

1  
2  
3  
4 in their community. But in fact there is often a gap between their aspiration and what they  
5  
6 actually experience. A cross sectional study showed that stroke survivors had more  
7  
8 participation restrictions[21]. Physical/structural and services/assistance barriers were  
9  
10 considered the dominant barriers to activity and participation for the stroke survivors in  
11  
12 China[22]. This research also found that the needs had a negative correlation with age. In  
13  
14 Ireland only 23% of those under the age of 66 got a full or part-time job after their stroke[11].  
15  
16 Those under retirement age would face a higher financial burden and social responsibility.  
17  
18 The age-specific burden of stroke in low-income and middle-income countries is greater than  
19  
20 in high-income countries[23]. In our survey, 97.6% of all the stroke survivors expected to get  
21  
22 financial support, much higher than the Irish survey[11]. Social supports should be provided  
23  
24 to stroke survivors, including barrier-free facilities and financial support, and what's more,  
25  
26 social security system for stroke survivors needs to be improved in developing countries such  
27  
28 as China.  
29  
30  
31  
32  
33  
34  
35

### 36 ***Information needs***

37  
38  
39 In the present study, most individuals wanted more information about the signs of stroke,  
40  
41 as well as what changes they would face after stroke. With more knowledge of stroke, they  
42  
43 could identify the disease immediately, thus resulting in a decrease in the time from symptom  
44  
45 onset to hospital arrival and increase in the number of patients who may receive appropriate  
46  
47 interventions[24]. Knowing the individual's abilities and limitations would help them to  
48  
49 prepare adequately for the future. Although stroke is a devastating disease for the individual,  
50  
51 family and society, many times the knowledge about stroke is going unheeded. Individuals  
52  
53 had extremely limited knowledge of stroke, which was reported in different countries[25-28].  
54  
55  
56  
57  
58  
59  
60

1  
2  
3  
4 A survey among patients with previous stroke or TIA in China showed that only 3.3% of the  
5  
6 patients knew all the stroke warning signs, and only 9.2% indicated they would get  
7  
8 emergency service[28]. In this study, we also found that the younger patients had stronger  
9  
10 needs to know the changes they would face after stroke. Stroke survivors had to adapt to  
11  
12 changes in their bodies as a result of stroke, and adjust their expectations included roles  
13  
14 within the home and community, particularly for those of working age. Another discovery in  
15  
16 our research was that as the level of education increased, so did the request for more  
17  
18 information on stroke. The well-educated patients had the desire to learn all they could about  
19  
20 stroke. Those with the least understanding of stroke were participants in an Irish survey that  
21  
22 only had a primary level education[29].  
23  
24  
25  
26  
27

28  
29 Educational strategies to increase stroke knowledge are urgently needed as a major part  
30  
31 to play in preventing and combating disease. As we had noticed this problem, efforts to health  
32  
33 education about stroke have been made to improve the recognition in China, especially in our  
34  
35 hospital, the education activities were held every world stroke day over the past few years to  
36  
37 once a month this year. Local and regional healthcare workers should put a high premium on  
38  
39 health education about stroke, not only to meet the needs of patients, but also to disseminate  
40  
41 the knowledge to the public, policymakers, and health professionals[30].  
42  
43  
44  
45

#### 46 ***The stroke caregivers' opinions***

47

48  
49 A stroke in the family can cause many shifts, whether it is relationship dynamics,  
50  
51 finances, home modifications, or role changes. The views of the stroke caregivers would  
52  
53 provide a valuable reference about the needs and rights of the stroke survivors, as the  
54  
55 caregivers provide the physical and psychological support in the daily life of stroke survivors.  
56  
57  
58  
59  
60

1  
2  
3  
4 92.5% caregivers thought that stroke survivors should have the rights listed in our  
5  
6 questionnaire. Not consistent with the stroke survivors, treatment and financial support for  
7  
8 care was the ultimate concern of the caregivers, which revealed the heavy burden of stroke  
9  
10 their family suffered and needs for social supports. The scores for these questions were  
11  
12 negatively correlated to their age, while positively correlated to their level of education. A  
13  
14 longitudinal study of caregivers' perspectives found that family caregivers expected to obtain  
15  
16 assistance and related care information[31]. Relevant information and counseling provided to  
17  
18 caregivers would be beneficial to the recovery and rehabilitation of stroke survivors.  
19  
20  
21  
22

### 23 ***Limitations***

24  
25  
26 Firstly, patients that were not able to express their views due to severe language or  
27  
28 cognitive impairment were excluded in the present study. The results could not reflect their  
29  
30 needs, which may lead to some bias. Secondly, nearly 70% of stroke survivors who  
31  
32 participated in this survey experienced their stroke less than one year ago, which fails to  
33  
34 accurately identify long-term needs. Finally, the number of participants was limited, and data  
35  
36 was only collected from one site, which may limit the generalizability of our results. Further  
37  
38 multiple central and large sample research studies may be needed in the future.  
39  
40  
41  
42

### 43 ***Conclusion***

44  
45  
46 The demands of psychological support, treatment and care, social support and  
47  
48 information about stroke in China were much more than we expected. Stroke services should  
49  
50 consider each individual stroke survivor's needs for psychological and physical care in the  
51  
52 whole course starting from the onset of stroke all the way through to rehabilitation and  
53  
54 reintegration into the community, which requires a more concerted effort across specialists in  
55  
56  
57  
58  
59  
60



1  
2  
3  
4 stroke units, communities and social supports. The Bill of Rights is also needed to be  
5  
6 recognized by the society in China, providing an appropriate stroke care to every patient for  
7  
8 optimizing stroke outcomes.  
9

### 10 11 **Acknowledgments**

12  
13 The authors would like to acknowledge World Stroke Organization (WSO) allowing us to  
14  
15 adapt the questionnaire about the rights of stroke survivors and caregivers. We acknowledge  
16  
17 doctors in Department of Neurology, The Second Hospital of Tianjin Medical University,  
18  
19 who had given us help to complete this study.  
20  
21  
22

### 23 24 **Contributorship statement**

25  
26 Xin Li contributed significantly to conceived and designed the study and revise manuscript.  
27  
28 Ming Liu contributed to the conception of the study and revised the manuscript. Xin Li and  
29  
30 Ming Liu are co-correspondence authors. Xiaoshuang Xia performed the data analyses and  
31  
32 wrote the manuscript. Peilu Wang collected the data from the survey. Shuting Zhang helped  
33  
34 collect the data. Lin Wang helped perform the analysis with constructive discussions.  
35  
36  
37  
38

### 39 40 **Competing interests**

41  
42 None declared.  
43

### 44 45 **Funding**

46  
47 This work is supported by the key project in the Science and Technology Foundation of  
48  
49 Tianjin Health and Family Planning [15KG136] and the Natural Science Foundation of  
50  
51 Tianjin[16JCYBJC25500].  
52

### 53 54 **Data sharing statement**

55  
56 No additional data are available.  
57  
58  
59  
60

## Disclosures:

None

## References

1. Bo Norrving BK. The global burden of stroke and need for a continuum of care. *Neurology* 2013;**80**(Suppl 2):S5-S12
2. JS K. Stroke in Asia: a global disaster. *International Journal of Stroke* 2014;**9**(7):856-57
3. Qian Jia L-PL, Yong-Jun Wang. Stroke in China. *Clinical and Experimental Pharmacology and Physiology* 2010;**37**:259-64
4. Miller EL ML, Richards L, Zorowitz RD, Bakas T, Clark P & Billinger SA. Comprehensive overview of nursing and interdisciplinary rehabilitation care of the stroke patient: a scientific statement from the American Heart Association. *Stroke* 2010;**41**:2402-48
5. Lawler M LCT, Banks I, Conte P, De Lorenzo F, Meunier F, Pinedo HM, Selby P, Murphy MJ, Johnston PG; European Cancer Concord (ECC). A Bill of Rights for patients with cancer in Europe. *Lancet Oncol* 2014;**15**(3):258-60
6. L. N. A Bill of "Rights" for patients with COPD: the "right" therapy for the "right" patient at the "right" time. *Thorax* 2010;**65**(1):2-3
7. Damrow J, Gaarder K, Chopra S, et al. Global stroke bill of rights. *Int J Stroke* 2014;**9**(8):964 doi: 10.1111/ijvs.12399[published Online First: Epub Date].
8. Davis S, Norrving B. World Stroke Day: one world voice for stroke. *Int J Stroke* 2013;**8** Suppl A100:2-3 doi: 10.1111/ijvs.12185[published Online First: Epub Date].
9. Rights TftGBo. World stroke organization web site. <http://www.world-stroke.org/newsletter/latest-updates/18-news/latest-updates/261-toolkit-for-the-global-bill-of-rights>:Accessed November 23, 2015.
10. McKeivitt C FN, Redfern J, Sheldenkar A, Crichton S, Rudd AR, Forster A, Young J, Nazareth I, Silver LE, Rothwell PM, Wolfe CD. Self-reported long-term needs after stroke. *Stroke* 2011;**42**(5):1398-403
11. Walsh ME GR, Loughnane C, Macey C, Horgan NF. Community re-integration and long-term need in the first five years after stroke: results from a national survey. *Disabil Rehabil* 2014;**13**:1-5
12. Chau JP TD, Chang AM, Woo J, Twinn S, Cheung SK, Kwok T. Depression among Chinese stroke survivors six months after discharge from a rehabilitation hospital. *J Clin Nurs* 2010;**19**(21-22):3042-50
13. Ekstam L JU, Guidetti S, Eriksson G, Ytterberg C. The combined perceptions of people with stroke and their carers regarding rehabilitation needs 1 year after stroke: a mixed methods study. *BMJ Open* 2015;**5**(2):e006784
14. Matsuzaki S HM, Yuki S, Koyama A, Hirata Y, Ikeda M. The relationship between post-stroke depression and physical recovery. *J Affect Disord* 2015;**176**:56-60
15. Park GY IS, Oh CH, Lee SJ, Pae CU. The association between the severity of poststroke depression and clinical outcomes after first-onset stroke in Korean patients. *Gen Hosp Psychiatry* 2015;**37**(3):245-50
16. Broomfield NM QT, Abdul-Rahim AH, Walters MR, Evans JJ. Depression and anxiety symptoms post-stroke/TIA: prevalence and associations in cross-sectional data from a regional stroke registry. *BMC Neurol* 2014;**14**:198
17. Kernan WN OB, Black HR, Bravata DM, Chimowitz MI, Ezekowitz MD, Fang MC, Fisher M, Furie KL, Heck DV, Johnston SC, Kasner SE, Kittner SJ, Mitchell PH, Rich MW, Richardson D, Schwamm LH, Wilson JA;

- American Heart Association Stroke Council, Council on Cardiovascular and Stroke Nursing, Council on Clinical Cardiology, and Council on Peripheral Vascular Disease. Guidelines for the prevention of stroke in patients with stroke and transient ischemic attack: a guideline for healthcare professionals from the American Heart Association/American Stroke Association. *Stroke* 2014;**45**(7):2160-236
18. Lip GY LD. Stroke prevention in atrial fibrillation: a systematic review. *JAMA* 2015;**313**(19):1950-62
19. Niu JW YJ, Gao S, Xu WH. Low awareness of stroke guidelines and preference for Chinese herbs in community physicians: a national survey in China. *Ann Transl Med* 2014;**2**(8):76
20. Lindsay P, Furie KL, Davis SM, Donnan GA, Norrving B. World Stroke Organization global stroke services guidelines and action plan. *Int J Stroke* 2014;**9** Suppl **A100**:4-13
21. Skolarus LE BJ, Brown DL, Freedman VA. Understanding Stroke Survivorship: Expanding the concept of post-stroke disability. *Stroke* 2014;**45**(1):224-30
22. Zhang L, Yan T, You L, Li K. Barriers to activity and participation for stroke survivors in rural China. *Archives of physical medicine and rehabilitation* 2015;**96**(7):1222-8
23. Feigin VL FM, Krishnamurthi R, Mensah GA, Connor M, Bennett DA, Moran AE, Sacco RL, Anderson L, Truelsen T, O'Donnell M, Venketasubramanian N, Barker-Collo S, Lawes CM, Wang W, Shinohara Y, Witt E, Ezzati M, Naghavi M, Murray C; Global Burden of Diseases, Injuries, and Risk Factors Study 2010 (GBD 2010) and the GBD Stroke Experts Group. Global and regional burden of stroke during 1990–2010: findings from the Global Burden of Disease Study 2010. *Lancet* 2014;**383**(9913):245-54
24. Hachinski V, Donnan GA, Gorelick PB, et al. Stroke: working toward a prioritized world agenda. *Stroke* 2010;**41**(6):1084-99
25. Nakibuuka J SM, Katabira E, Ddumba E, Byakika-Tusiime J, Furlan AJ. Knowledge and Perception of Stroke: A Population-Based Survey in Uganda. *ISRN Stroke* 2014;**2014**
26. Hickey A OHA, McGee H, Donnellan C, Shelley E, Horgan F, O'Neill D. Stroke awareness in the general population: knowledge of stroke risk factors and warning signs in older adults. *BMC Geriatr* 2009;**9**:35
27. Akiyama H HY. Knowledge of transient ischemic attack among the Japanese. *J Stroke Cerebrovasc Dis* 2013;**22**(4):457-64
28. Zeng Y HG, Yi GH, Huang YJ, Zhang QH, He LL. Knowledge of stroke warning signs and risk factors among patients with previous stroke or TIA in China. *J Clin Nurs* 2012;**21**(19-20):2886-95
29. Hickey A HD, McGee H, Conroy R, Shelley E. Knowledge of stroke risk factors and warning signs in Ireland: development and application of the Stroke Awareness Questionnaire (SAQ). *Int J Stroke* 2012;**7**(4):298-306
30. Hachinski V. World Stroke Day Proclamation. *stroke* 2008;**39**:2409-20
31. Tsai PC YP, Tai JJ, Lou MF. Needs of family caregivers of stroke patients: a longitudinal study of caregivers' perspectives. *Patient Prefer Adherence* 2015;**9**:449-57

# BMJ Open

## Needs and rights awareness of stroke survivors and caregivers: a cross-sectional, single-centre questionnaire survey

|                                 |                                                                                                                                                                                                                                                                                                                                                                                                                                                                                                                                                                                                                       |
|---------------------------------|-----------------------------------------------------------------------------------------------------------------------------------------------------------------------------------------------------------------------------------------------------------------------------------------------------------------------------------------------------------------------------------------------------------------------------------------------------------------------------------------------------------------------------------------------------------------------------------------------------------------------|
| Journal:                        | <i>BMJ Open</i>                                                                                                                                                                                                                                                                                                                                                                                                                                                                                                                                                                                                       |
| Manuscript ID                   | bmjopen-2016-013210.R1                                                                                                                                                                                                                                                                                                                                                                                                                                                                                                                                                                                                |
| Article Type:                   | Research                                                                                                                                                                                                                                                                                                                                                                                                                                                                                                                                                                                                              |
| Date Submitted by the Author:   | 30-Nov-2016                                                                                                                                                                                                                                                                                                                                                                                                                                                                                                                                                                                                           |
| Complete List of Authors:       | Li, Xin; The Second Hospital of Tianjin Medical University, Tianjin, China , Neurology<br>Xia, Xiaoshuang; The Second Hospital of Tianjin Medical University, Tianjin, China , Neurology<br>Wang, Peilu; The Second Hospital of Tianjin Medical University, Tianjin, China , Neurology<br>Zhang, Shuting; Stroke Clinical Research Unit; West China Hospital, Sichuan University, Chengdu, China, Neurology<br>Liu, M; Stroke Clinical Research Unit; West China Hospital, Sichuan University, Chengdu, China, Neurology<br>Wang, Lin; The Second Hospital of Tianjin Medical University, Tianjin, China , Geratology |
| <b>Primary Subject Heading</b>: | Neurology                                                                                                                                                                                                                                                                                                                                                                                                                                                                                                                                                                                                             |
| Secondary Subject Heading:      | Public health, Patient-centred medicine, Mental health, Medical education and training                                                                                                                                                                                                                                                                                                                                                                                                                                                                                                                                |
| Keywords:                       | needs, patients rights, Stroke < NEUROLOGY, caregivers, survey                                                                                                                                                                                                                                                                                                                                                                                                                                                                                                                                                        |
|                                 |                                                                                                                                                                                                                                                                                                                                                                                                                                                                                                                                                                                                                       |

SCHOLARONE™  
Manuscripts

---

1  
2  
3  
4 1  
5  
6 2 **Needs and rights awareness of stroke survivors and caregivers: a**  
7  
8  
9 3 **cross-sectional, single-centre questionnaire survey**  
10  
11 4

12  
13  
14 5 Xin Li,<sup>1</sup> Xiaoshuang Xia,<sup>1</sup> Peilu Wang,<sup>1</sup> Shuting Zhang,<sup>2</sup> Ming Liu,<sup>2</sup> Lin Wang<sup>3</sup>  
15

16 6 <sup>1</sup>Department of Neurology, The Second Hospital of Tianjin Medical University, Tianjin,  
17  
18 7 China  
19

20  
21 8 <sup>2</sup>Stroke Clinical Research Unit, Department of Neurology, West China Hospital, Sichuan  
22  
23 9 University, Chengdu, China  
24

25  
26 10 <sup>3</sup>Department of Geratology, The Second Hospital of Tianjin Medical University and Tianjin  
27  
28 11 Geriatric Institute, Tianjin, China  
29

30  
31 12 Correspondence to:

32  
33  
34 13 Xin Li, MD, PhD, Department of Neurology, The Second Hospital of Tianjin Medical  
35  
36 14 University, No 22, Pingjiang Road, Hexi District, Tianjin 300211, China, [lixin@126.com](mailto:lixin@126.com)  
37

38  
39 15 or Ming Liu, MD, PhD, Stroke Clinical Research Unit, Department of Neurology, West China  
40  
41 16 Hospital, Sichuan University, No 37, Guo Xue Xiang, Chengdu 610041, China,  
42

43  
44 17 [wypmh@hotmail.com](mailto:wypmh@hotmail.com),  
45

46  
47 18  
48  
49 19 Key words: needs, patient rights, stroke, caregivers, survey

50  
51 20 Word count: 4623  
52

53  
54 21  
55  
56  
57  
58  
59  
60

---

1  
2  
3  
4  
5  
6  
7  
8  
9  
10  
11  
12  
13  
14  
15  
16  
17  
18  
19  
20  
21  
22  
23  
24  
25  
26  
27  
28  
29  
30  
31  
32  
33  
34  
35  
36  
37  
38  
39  
40  
41  
42  
43  
44  
45  
46  
47  
48  
49  
50  
51  
52  
53  
54  
55  
56  
57  
58  
59  
60

1 **ABSTRACT**

2 **Objectives:** The needs and rights awareness of stroke survivors have not been reported in  
3 China. This study investigated the needs and rights awareness of stroke survivors and  
4 caregivers in Tianjin, China.

5 **Setting:** A survey launched by the World Stroke Organization (WSO) was conducted in  
6 Tianjin, China. The questionnaire included demands for psychological support, treatment and  
7 care, social support, and information. Stroke survivors and their caregivers were interviewed  
8 face to face for the questionnaire. Between June 2014 and February 2015, stroke survivors  
9 were invited to participate if they were over 18 years old and had experienced a stroke.  
10 Exclusion criteria were patients who had disorders of consciousness, significant cognitive  
11 impairment, aphasia, communication difficulties or psychiatric disorders. Only caregivers  
12 who were family members of the patients were chosen. Paid caregivers were excluded.

13 **Participants:** Two hundred forty-eight stroke survivors and 212 caregivers were enrolled.

14 **Primary outcome measures:** The correlations between levels of needs and potential effect  
15 factors were analysed. Levels of different needs were compared by age, gender and time  
16 since stroke.

17 **Results:** Among the cohort, 95.6% stroke survivors and 92.5% caregivers agreed to each  
18 question in the questionnaire. The participants prioritised the needs for psychological support  
19 (99.4%), treatment and care (98.6%), social support (98%), and information (96.2%). The  
20 total score was negatively correlated with age ( $r=-0.255$ ,  $P<0.01$ ). Patients under 65 years old  
21 had higher scores than those 65 years or older ( $P<0.01$ ), while male patients had higher  
22 scores than female patients ( $P<0.01$ ).

1  
2  
3  
4 1 **Conclusions:** The needs for psychological and emotional support, individual treatment, social  
5  
6 2 support and information about stroke were eagerly reported by most survivors. The Bill of  
7  
8 3 Rights must be recognised by the Chinese society, providing appropriate stroke care to every  
9  
10 4 patient to optimise stroke outcomes.  
11  
12  
13  
14  
15

### 16 **Strengths and limitations of this study**

- 17  
18 7 ■ Stroke survivors and caregivers did not have their own bill of rights when this study was  
19  
20 8 performed, and their needs and rights awareness have not been reported in China.
- 21  
22 9 ■ The demands for psychological and emotional support, individual treatment, social  
23  
24 10 support and information were eagerly reported by most stroke survivors.
- 25  
26 11 ■ The stroke survivors in China had the strongest demand for emotional and psychological  
27  
28 12 support, which should be recognised.
- 29  
30 13 ■ Limitations include potential bias due to the exclusion of patients with severe language  
31  
32 14 or cognitive impairment. The number of participants was also limited. Further  
33  
34 15 multiple-centre and large-sample research studies may be needed.  
35  
36  
37  
38  
39  
40  
41  
42  
43

### 44 **INTRODUCTION**

45  
46 18 Stroke is a major cause of death and disability worldwide. The burden of stroke is  
47  
48 19 particularly serious in Asia[1], and its mortality is higher than that in Europe or North  
49  
50 20 America[2]. In China, it is the leading cause of death and disability[3]. Stroke survivors cope  
51  
52 21 with significant physical, cognitive and emotional deficits, and 25% to 74% of these  
53  
54 22 survivors require some assistance or are fully dependent on their caregivers for activities of  
55  
56  
57  
58  
59  
60

1  
2  
3  
4 1 daily living[4]. Although much has been done to control the disease, the stroke survivors'  
5  
6 2 needs and rights have not received adequate attention. Bills of patient rights for several  
7  
8  
9 3 diseases have been developed to achieve higher degrees of patient satisfaction, such as for  
10  
11 4 cancer[5] and chronic obstructive pulmonary disease[6]. Stroke survivors did not have their  
12  
13  
14 5 own bill of rights until the World Stroke Organization (WSO) realised this urgent need and  
15  
16 6 framed a global bill of rights for stroke patients[7]. The WSO has numerous strategies to  
17  
18  
19 7 increase stroke awareness, including influencing policies for stroke prevention and improved  
20  
21 8 health services, providing education, and fostering the development of systems and  
22  
23  
24 9 organisations for the long-term support of stroke survivors and their families[8]. To determine  
25  
26 10 what stroke survivors and caregivers require, the WSO has launched an online survey.  
27  
28

29 11 This survey was used in this study to investigate the needs and rights awareness in  
30  
31 12 Chinese stroke survivors and caregivers. This study was aimed to provide a reference for the  
32  
33  
34 13 improvement of stroke-related laws and bills, which could provide the stroke survivor with  
35  
36 14 physical, mental and emotional support.  
37  
38

39 15

## 40 41 16 ***METHODS***

### 42 43 44 17 ***Study population***

45  
46 18 This study was approved by our local Ethics Committee at the Second Hospital of  
47  
48  
49 19 Tianjin Medical University. All patients and their caregivers gave informed consent.  
50

51 20 Between June 2014 and February 2015, 248 stroke survivors and 212 caregivers from  
52  
53  
54 21 the Stroke Clinical Registry and Follow-up Database of the Second Hospital of Tianjin  
55  
56  
57 22 Medical University were enrolled. According to the sample size determination method of the  
58  
59  
60



---

1 questionnaire, at least 70-140 samples were needed; therefore, we recruited more participants  
2 than the sample size determined. Stroke survivors were invited to participate if they were  
3 over 18 years old, had experienced stroke and agreed to participate in the study. The  
4 exclusion criteria were patients who had disorders of consciousness, significant cognitive  
5 impairment, aphasia, communication difficulties or psychiatric disorders.

6 Caregivers who had been taking care of the stroke patients who met the above criteria  
7 were recruited. Only caregivers who were family members of the patients were chosen. Paid  
8 caregivers were excluded.

### 9 *Development of the survey*

10 The questionnaire was adapted from that designed by the WSO. Stroke survivors and  
11 caregivers were interviewed face to face during the patients' follow-up by well-trained  
12 neurologists who were not the patients' treating doctors.

13 The final questionnaire included 17 questions covering age, gender, level of education,  
14 time since the first stroke, and demands for treatment and information about stroke and  
15 psychological and social support. Fourteen of the questions had five choices for each question.  
16 The five choices were strongly agree, agree, neutral, disagree and strongly disagree. The  
17 Likert 5-grade score method was used to assign 1-5 points; higher scores indicated a greater  
18 degree of demand. The purpose of the survey and the procedure were explained fully to all  
19 participants.

20 The questionnaire translated to Chinese was tested again for the reliability in our  
21 population. The scales reliability of the stroke survivors' questionnaire was assessed with a  
22 total Cronbach's  $\alpha$  of 0.910, corrected by inter-item correlation above 0.70. The scales

reliability of the stroke caregivers' questionnaire was assessed with a total Cronbach's  $\alpha$  of 0.817, corrected by inter-item correlation of above 0.70. The Cronbach's  $\alpha$  values were good for all scales for the study.

### ***Statistical Analysis***

Frequencies and proportions were used to summarize levels of answers. The Spearman Rank Relational Coefficient was used to analyze the correlations between levels of needs and potential effect factors. Levels of different needs were compared by age, gender, and time since stroke. Categorical variables are displayed as frequencies and percentages. Categorical variables were analyzed using a chi-square ( $\chi^2$ ) test. Comparisons between groups were made using the Mann–Whitney  $U$  test. Statistical tests were performed at the 95% confidence level.

## ***RESULTS***

### ***Study population***

The descriptive characteristics of stroke survivors and caregivers are summarised in Table 1.

The 248 stroke survivors included 123 women and 125 men between the ages of 33 and 92, with a mean age of 69.5. The 212 caregivers included 117 women and 95 men between the ages of 20 and 88, with a mean age of 52.6. Stroke survivors they cared for were aged between 45 and 92 years, with a mean age of 72.2.

**Table 1 Characteristics of stroke survivors and caregivers**

|  | Stroke Survivors | Stroke Caregivers |
|--|------------------|-------------------|
|  | N (%)            | N (%)             |

| Total              | 248        | 212         |
|--------------------|------------|-------------|
| Age                |            |             |
| <45                | 3(1.2%)    | 49(23.1%)   |
| 45-54              | 29(11.7%)  | 69(32.5%)   |
| 55-64              | 54(21.8%)  | 65(30.7%)   |
| 65-74              | 63(25.4%)  | 21(9.9%)    |
| 75-84              | 73(29.4%)  | 5(2.4%)     |
| ≥85                | 26(10.5%)  | 3(1.4%)     |
| Gender             |            |             |
| Male               | 125(50.4%) | 95(44.8%)   |
| Female             | 123(49.6%) | 117 (55.2%) |
| Time since stroke  |            |             |
| <1y                | 170(68.5%) | 132 (62.3%) |
| 1-3y               | 41(16.5%)  | 37(17.5%)   |
| 4-7y               | 13(5.2%)   | 22(10.4%)   |
| 8-10y              | 6(2.4%)    | 8(3.8%)     |
| >10y               | 18(7.3%)   | 13(6.1%)    |
| Education          |            |             |
| <3y                | 19(7.7%)   | 2(0.9%)     |
| 3-6y               | 44(17.7%)  | 13(6.1%)    |
| 6-9y               | 70(28.2%)  | 56(26.4%)   |
| 9-12y              | 88(35.5%)  | 93(43.9%)   |
| >12y               | 27(10.9%)  | 48(22.6%)   |
| Type of stroke     |            |             |
| Ischemic stroke    | 192(77.4%) | 170(80.2%)  |
| Hemorrhagic stroke | 56(22.6%)  | 42(19.8%)   |
| NIHSS* Score       |            |             |
| <4                 | 115(46.4%) | 90(42.5%)   |

|      |            |            |
|------|------------|------------|
| 4-15 | 127(51.2%) | 116(54.7%) |
| >15  | 6(2.4%)    | 6(2.8%)    |

\* NIHSS: National institutes of Health Stroke Scale

Among the cohort, 95.6% of the stroke survivors approved of each question in the questionnaire. The results of the survey showed that participants prioritised the need for psychological support (99.4%), treatment and care (98.6%), social support (98%) and information (96.2%). The total score and every aspect of need was negatively correlated with age ( $P<0.01$ ). There were no correlations between needs and type of stroke or National Institutes of Health Stroke Scale score ( $P>0.05$ ).

**Table 2 The correlations between levels of needs and potential effect factors**

|                   | Total  |        | Psychological support |       | Information |        | Treatment and care |       | Social support |        |
|-------------------|--------|--------|-----------------------|-------|-------------|--------|--------------------|-------|----------------|--------|
|                   | rho    | P      | Rho                   | P     | Rh          | P      | rho                | P     | Rho            | P      |
| Age               | -0.255 | <0.001 | -0.211                | 0.001 | -0.221      | <0.001 | -0.197             | 0.002 | -0.245         | <0.001 |
| Gender            | -0.14  | 0.027  | -0.184                | 0.004 | 0.052       | 0.419  | -0.130             | 0.041 | -0.131         | 0.039  |
| Time since stroke | -0.044 | 0.487  | 0.095                 | 0.135 | -0.063      | 0.324  | -0.127             | 0.046 | -0.029         | 0.647  |
| Education         | 0.099  | 0.121  | -0.000                | 0.998 | 0.051       | 0.427  | -0.067             | 0.293 | 0.010          | 0.879  |
| Type of stroke    | -0.089 | 0.162  | -0.017                | 0.791 | 0.075       | 0.242  | -0.044             | 0.494 | 0.005          | 0.932  |
| NIHSS Score       | -0.088 | 0.169  | 0.010                 | 0.877 | -0.059      | 0.352  | -0.087             | 0.172 | -0.036         | 0.578  |

The total needs and every aspect of the needs of patients under 65 years old were higher than those of older patients (65 years or older) ( $P<0.05$ ). Moreover, male patients had higher scores for total needs, psychological needs, needs for treatment and care and needs for social support than female patients ( $P<0.05$ ) (Table 3 and Table 4).

1 **Table 3. Needs of stroke survivors by age**

|     | Total        | Psychological<br>support | Information  | Treatment<br>and care | Social<br>support |
|-----|--------------|--------------------------|--------------|-----------------------|-------------------|
| <65 | 4.7(4.1-5.0) | 5.0(4.0-5.0)             | 4.5(4.0-5.0) | 4.6(4.0-5.0)          | 4.6(4.0-5.0)      |
| ≥65 | 4.2(4.0-4.7) | 4.0(4.0-5.0)             | 4.0(4.0-4.5) | 4.2(4.0-4.8)          | 4.0(4.0-4.8)      |
| Z   | -4.179       | -3.314                   | -3.477       | -3.090                | -3.855            |
| P   | <0.001       | 0.001                    | 0.001        | 0.002                 | <0.001            |

2 **Table 4. Needs of rural stroke survivors by gender**

|        | Total        | Psychological<br>support | Information  | Treatment<br>and care | Social<br>support |
|--------|--------------|--------------------------|--------------|-----------------------|-------------------|
| Male   | 4.3(4.0-5.0) | 4.5(4.0-5.0)             | 4.0(4.0-5.0) | 4.4(4.0-5.0)          | 4.4(4.0-5.0)      |
| Female | 4.1(4.0-4.9) | 4.0(4.0-5.0)             | 4.0(4.0-5.0) | 4.2(4.0-4.8)          | 4.2(4.0-4.8)      |
| Z      | -2.210       | -2.893                   | -0.810       | -2.043                | -2.063            |
| P      | 0.027        | 0.004                    | 0.418        | 0.041                 | 0.039             |

3 **Caregivers' opinion**

4  
5  
6  
7 Among the caregivers, 92.5% approved of each question in the questionnaire. Timely  
8 diagnosis and treatment appeared to be uppermost in caregivers' minds (99.1%). They also  
9 cared about financial support to aid in the patient's recovery (98.6%). The total score of  
10 caregivers was negatively correlated with the age of the caregivers ( $r=-0.197$ ,  $P=0.004$ ),  
11 while positively correlated with levels of education ( $r=2.259$ ,  $P<0.001$ ). No correlation was

1 found between the scores and gender or time that the patients they cared for experienced their  
2 first stroke ( $P>0.05$ ).

### 4 ***DISCUSSION***

5 In this study, 95.6% stroke survivors and 92.5% of caregivers approved of each question,  
6 which showed that most patients were eager for a formal declaration of their rights. The  
7 Global Stroke Bill of Rights, developed by the WSO, sets out the right of each stroke  
8 survivor to: receive the best stroke care, be informed and prepared, and be supported in their  
9 recovery[9].

#### 10 ***Factors that influenced the awareness of needs and rights***

11 This survey showed that patients under 65 years old had more needs than younger  
12 patients. The needs and awareness of rights were negatively correlated with the age of the  
13 patients. Because of different social and domestic duties between younger and older patients,  
14 younger patients yearned for a higher quality of life after experiencing stroke. They seemed  
15 keener to acquire knowledge of stroke and appropriate therapies as well as emotional and  
16 social support. This result did not match the findings of a similar survey conducted in the  
17 UK[10], which reported that there was no relationship between needs and age. Patients over  
18 65 years of age constituted 47.5% of the subjects in the British survey, while in this survey,  
19 65.3% of the patients were above 65 years old. In addition, unlike other surveys, this survey  
20 found that male patients had a stronger demand for and were more conscious of their rights.  
21 This phenomenon could be due to the traditional thought of "male superiority to female" in  
22 Chinese tradition society. A study in China showed that there was a sex difference in the

1  
2  
3  
4 1 social participation domain in Chinese stroke patients, and male patients had higher social  
5  
6 2 desires[11].  
7

8  
9 3 Our study is consistent with the UK study[10], where no significant correlation was  
10  
11 4 found between the total scores and levels of education. There was also no correlation between  
12  
13 5 the needs and the time since the first stroke. Similarly, Walsh et al.[12] found no significant  
14  
15 6 difference in time since stroke between those who reported multiple unmet needs and those  
16  
17 7 who reported one or no unmet needs.  
18

### 21 8 *Psychological support*

22  
23  
24 9 As shown in our results, the questions related to psychological needs received the  
25  
26 10 highest score and the highest support rate, suggesting that stroke survivors in China had the  
27  
28 11 strongest demand for emotional and psychological support. A sudden attack and poor  
29  
30 12 prognosis had an appreciable effect on the psychology of stroke survivors. Some surveys  
31  
32 13 have demonstrated that emotional problems among stroke survivors would be prejudicial to  
33  
34 14 treatment and rehabilitation after stroke[13-15]. As physicians, we usually pay more attention  
35  
36 15 to treating the disease, rather than the emotional needs of the patients. A national survey  
37  
38 16 carried out in Ireland showed that 77% of respondents suffered from emotional problems  
39  
40 17 after stroke, while only 10% of the respondents had received community psychological  
41  
42 18 service[12]. Since emotional and psychological needs are liable to be neglected, post-stroke  
43  
44 19 depression was a common complication which seriously impairs quality of life[16 17].  
45  
46 20 Psychological expertise and formal psychological support were needed by stroke  
47  
48 21 survivors[18]. The newest version of the Chinese Stroke Guidelines goes further,  
49  
50 22 recommending psychological support.  
51  
52  
53  
54  
55  
56  
57  
58  
59  
60

---

### 1 *Needs for treatment and care*

2           The needs for diagnosis, treatment, care and rehabilitation were second only to the  
3 need for psychological support. The strategies should vary depending on the cause,  
4 pathophysiological mechanisms, severity and prognosis to reduce the risk of a recurrent  
5 event[19]. Patients should be assessed for individual risks, such as atrial fibrillation, in which  
6 case antithrombotic therapy oral anticoagulation may be needed for effective stroke  
7 prevention[20]. Most stroke survivors suffer from different residual deficits; individualised  
8 and optimised care is also needed during inpatient and in chronic care and end-of-life  
9 settings[4]. Rehabilitation was usually ignored in busy clinical settings prior to discharge  
10 from hospital in China, and there was also a lack of post-discharge rehabilitation services.  
11 The patients perceived nurse-led coordination of rehabilitation and ongoing changes of  
12 rehabilitation goals in different stages of recovery[21]. A considerable unmet need for  
13 poststroke rehabilitation services was also found in other low- and middle-income countries,  
14 such as India[22]. As stroke is an emergency and disastrous disease, a timely and appropriate  
15 diagnosis and therapy made by specialised neurologists is vital to the survival and recovery of  
16 the patients. A well-organised continuing medical education system for community doctors  
17 and non-neurologists covering stroke should be established in China[23], as well as a stroke  
18 services system in accordance with the WSO Global Stroke Services Guidelines and Action  
19 Plan[24], reminding us that stroke awareness, education, prevention and treatment should  
20 always be feasible.

### 21 *Social support*

22           In this study, the stroke survivors exhibited a desire to return to their full range of



1 activities and roles they had before their stroke, playing an active role in their own lives and  
2 in their community. However, there is often a gap between their aspiration and what they  
3 actually experience. A cross-sectional study showed that stroke survivors had more  
4 participation restrictions[25]. Physical/structural and services/assistance were considered the  
5 dominant barriers to and participation in activities of daily life for stroke survivors in  
6 China[26]. This research also found that needs had a negative correlation with age. In Ireland,  
7 only 23% of those under the age of 66 obtained a full- or part-time job after stroke[11]. Those  
8 under retirement age would face a higher financial burden and social responsibility. The  
9 age-specific burden of stroke in low-income and middle-income countries is greater than in  
10 high-income countries[27]. In our survey, 97.6% of all the stroke survivors expected to  
11 receive financial support, much higher than in the Irish survey[11]. Social support should be  
12 provided to stroke survivors, including barrier-free facilities and financial support;  
13 furthermore, the social security system for stroke survivors needs to be improved in  
14 developing countries such as China.

### 15 ***Information needs***

16 In the present study, most individuals wanted more information about the signs of stroke,  
17 as well as what changes they would face afterwards. With more knowledge of stroke, they  
18 could identify the disease immediately, resulting in a decrease in the time from symptom  
19 onset to hospital arrival and increase in the number of patients who may receive appropriate  
20 interventions[28]. Knowing the individual's abilities and limitations would help them to  
21 prepare adequately for the future. Although stroke is a devastating disease for the individual,  
22 family and society, many times their knowledge about stroke goes unheeded. Individuals had

1 an extremely limited knowledge of stroke, which was also reported in other countries[29-32].  
2 A survey among patients with previous stroke or transient ischemic attack in China showed  
3 that only 3.3% of patients knew all the stroke warning signs, and only 9.2% indicated that  
4 they would seek emergency service[32]. In this study, we also found that younger patients  
5 had a stronger need to know about the changes they would face after stroke. Stroke survivors  
6 had to adapt to changes in their bodies as a result of stroke and adjust their expectations,  
7 including roles within the home and community, particularly for those of working age.  
8 Another discovery in our research was that as the level of education increased, so did the  
9 request for more information on stroke. Well-educated patients had the desire to learn all they  
10 could about stroke. Those with the least understanding of stroke were participants in an Irish  
11 survey that only had a primary level of education[33].

12 Educational strategies to increase stroke knowledge are urgently needed to combat and  
13 prevent disease. We have made efforts to educate physicians and patients about stroke to  
14 improve the recognition of this condition in China, especially in our hospital. Educational  
15 activities have been held every world stroke day over the past few years and once a month  
16 this year. Local and regional healthcare workers should put a high premium on health  
17 education about stroke, not only to meet the needs of patients, but also to disseminate the  
18 knowledge to the public, policymakers and health professionals[34].

### 19 *The stroke caregivers' opinions*

20 A stroke in the family can cause many shifts, whether it is relationship dynamics,  
21 finances, home modifications or role changes. The views of caregivers of stroke survivors  
22 would provide a valuable reference about the needs and rights of these patients, as the

1 caregivers provide physical and psychological support in the daily life of stroke survivors.  
2 Not consistent with the stroke survivors, the caregivers' ultimate concern was treatment and  
3 financial support, which revealed the heavy burden the family suffered due to stroke and need  
4 for social support. The scores for these questions were negatively correlated to their age,  
5 while positively correlated to their level of education. A longitudinal study of caregivers'  
6 perspectives found that family caregivers expected to obtain assistance and care-related  
7 information[35]. Providing caregivers with relevant information and counseling would be  
8 beneficial to the recovery and rehabilitation of stroke survivors.

### 9 ***Limitations***

10 First, patients who were not able to express their views due to severe language or  
11 cognitive impairment were excluded from the present study. The results could not reflect their  
12 needs, which may lead to some bias. Secondly, nearly 70% of stroke survivors who  
13 participated in this survey experienced their stroke less than one year ago; therefore, their  
14 long-term needs might not have been met accurately. Finally, the number of participants was  
15 limited, and data were only collected from one site, which may limit the generalisability of  
16 our results. In addition, we did not use in-depth interviews or focus groups to explore the  
17 reasons behind the patients' needs. Further multiple-centre and large-sample research studies  
18 may be needed in the future to explore the needs of stroke survivors using these techniques.

### 19 ***Conclusion***

20 The demands of psychological support, treatment and care, social support and  
21 information about stroke in China were much more than we expected. Stroke services should  
22 consider each individual stroke survivor's needs for psychological and physical care in the

1 whole course of their condition, from the onset of stroke through rehabilitation and  
2 reintegration into the community, which requires a more concerted effort across specialists in  
3 stroke units, communities and social supports. The Bill of Rights must also be recognised by  
4 Chinese society, providing appropriate stroke care to every patient to optimise stroke  
5 outcomes.

### 6 **Acknowledgments**

7 The authors would like to acknowledge the World Stroke Organization (WSO), which  
8 allowed us to adapt the questionnaire about the rights of stroke survivors and caregivers. We  
9 acknowledge the doctors in the Department of Neurology, the Second Hospital of Tianjin  
10 Medical University, who gave us help to complete this study.

### 11 **Contributorship statement**

12 Xin Li contributed conceived and designed the study and revised the manuscript. Ming Liu  
13 conceived of the study and revised the manuscript. Xin Li and Ming Liu are  
14 co-correspondence authors. Xiaoshuang Xia analysed the data and wrote the manuscript.  
15 Peilu Wang collected the data from the survey. Shuting Zhang helped collect the data. Lin  
16 Wang helped perform the analysis with constructive discussions.

### 17 **Competing interests**

18 None declared.

### 19 **Funding**

20 This work is supported by the key project in the Science and Technology Foundation of  
21 Tianjin Health and Family Planning [15KG136] and the Natural Science Foundation of  
22 Tianjin[16JCYBJC25500].

## 1 Data sharing statement

2 No additional data are available.

## 3 Disclosures:

4 None

## 5 References

- 6 1. Bo Norrvig BK. The global burden of stroke and need for a continuum of care. *Neurology* 2013;**80**(Suppl  
7 2):S5-S12
- 8 2. JS K. Stroke in Asia: a global disaster. *International Journal of Stroke* 2014;**9**(7):856-57
- 9 3. Qian Jia L-PL, Yong-Jun Wang. Stroke in China. *Clinical and Experimental Pharmacology and Physiology*  
10 2010;**37**:259-64
- 11 4. Miller EL ML, Richards L, Zorowitz RD, Bakas T, Clark P & Billinger SA. Comprehensive overview of nursing and  
12 interdisciplinary rehabilitation care of the stroke patient: a scientific statement from the American  
13 Heart Association. *Stroke* 2010;**41**:2402-48
- 14 5. Lawler M LCT, Banks I, Conte P, De Lorenzo F, Meunier F, Pinedo HM, Selby P, Murphy MJ, Johnston PG;  
15 European Cancer Concord (ECC). A Bill of Rights for patients with cancer in Europe. *Lancet Oncol*  
16 2014;**15**(3):258-60
- 17 6. L. N. A Bill of "Rights" for patients with COPD: the "right" therapy for the "right" patient at the "right" time.  
18 *Thorax* 2010;**65**(1):2-3
- 19 7. Damrow J, Gaarder K, Chopra S, et al. Global stroke bill of rights. *Int J Stroke* 2014;**9**(8):964 doi:  
20 10.1111/ijis.12399[published Online First: Epub Date]].
- 21 8. Davis S, Norrvig B. World Stroke Day: one world voice for stroke. *Int J Stroke* 2013;**8 Suppl A100**:2-3 doi:  
22 10.1111/ijis.12185[published Online First: Epub Date]].
- 23 9. Rights TftGBo. World stroke organization web site.  
24 [http://www.world-stroke.org/newsletter/latest-updates/18-news/latest-updates/261-toolkit-for-the-gl](http://www.world-stroke.org/newsletter/latest-updates/18-news/latest-updates/261-toolkit-for-the-global-bill-of-rights)  
25 obal-bill-of-rights:Accessed November 23, 2015.
- 26 10. McKeivitt C FN, Redfern J, Sheldenkar A, Crichton S, Rudd AR, Forster A, Young J, Nazareth I, Silver LE,  
27 Rothwell PM, Wolfe CD. Self-reported long-term needs after stroke. *Stroke* 2011;**42**(5):1398-403
- 28 11. Wu X, Min L, Cong L, Jia Y, Liu C, Zhao H, Liu P, Luo Y. Sex differences in health-related quality of life among  
29 adult stroke patients in Northeastern China. *J Clin Neurosci* 2014; **21**(6):957-61
- 30 12. Walsh ME GR, Loughnane C, Macey C, Horgan NF. Community re-integration and long-term need in the first  
31 five years after stroke: results from a national survey. *Disabil Rehabil* 2014;**13**:1-5
- 32 13. Chau JP TD, Chang AM, Woo J, Twinn S, Cheung SK, Kwok T. Depression among Chinese stroke survivors six  
33 months after discharge from a rehabilitation hospital. *J Clin Nurs* 2010;**19**(21-22):3042-50
- 34 14. Ekstam L JU, Guidetti S, Eriksson G, Ytterberg C. The combined perceptions of people with stroke and their  
35 carers regarding rehabilitation needs 1 year after stroke: a mixed methods study. *BMJ Open*  
36 2015;**5**(2):e006784
- 37 15. Matsuzaki S HM, Yuki S, Koyama A, Hirata Y, Ikeda M. The relationship between post-stroke depression and  
38 physical recovery. *J Affect Disord* 2015;**176**:56-60
- 39 16. Park GY IS, Oh CH, Lee SJ, Pae CU. The association between the severity of poststroke depression and

- 1 clinical outcomes after first-onset stroke in Korean patients. *Gen Hosp Psychiatry* 2015;**37**(3):245-50
- 2 17. Broomfield NM QT, Abdul-Rahim AH, Walters MR, Evans JJ. Depression and anxiety symptoms
- 3 post-stroke/TIA: prevalence and associations in cross-sectional data from a regional stroke registry.
- 4 *BMC Neurol* 2014;**14**:198
- 5 18. Harrison M, Ryan T, Gardiner C, Jones A. Psychological and emotional needs, assessment, and support
- 6 post-stroke: a multi-perspective qualitative study. *Top Stroke Rehabil* 2016;**16**:1-7
- 7 19. Kernan WN OB, Black HR, Bravata DM, Chimowitz MI, Ezekowitz MD, Fang MC, Fisher M, Furie KL, Heck DV,
- 8 Johnston SC, Kasner SE, Kittner SJ, Mitchell PH, Rich MW, Richardson D, Schwamm LH, Wilson JA;
- 9 American Heart Association Stroke Council, Council on Cardiovascular and Stroke Nursing, Council on
- 10 Clinical Cardiology, and Council on Peripheral Vascular Disease. Guidelines for the prevention of stroke
- 11 in patients with stroke and transient ischemic attack: a guideline for healthcare professionals from the
- 12 American Heart Association/American Stroke Association. *Stroke* 2014;**45**(7):2160-236
- 13 20. Lip GY LD. Stroke prevention in atrial fibrillation: a systematic review. *JAMA* 2015;**313**(19):1950-62
- 14 21. Chen L, Xiao LD, De Bellis A. First-time stroke survivors and caregivers' perceptions of being engaged in
- 15 rehabilitation. *J Adv Nurs* 2016;**72**(1):73-84
- 16 22. Kamalakannan S, Gudlavalleti Venkata M, Prost A, Natarajan S, Pant H, Chitalurri N, Goenka S, Kuper H.
- 17 Rehabilitation Needs of Stroke Survivors After Discharge From Hospital in India. *Arch Phys Med*
- 18 *Rehabil* 2016;**97**(9):1526-1532.e9
- 19 23. Niu JW YJ, Gao S, Xu WH. Low awareness of stroke guidelines and preference for Chinese herbs in
- 20 community physicians: a national survey in China. *Ann Transl Med* 2014;**2**(8):76
- 21 24. Lindsay P, Furie KL, Davis SM, Donnan GA, Norrving B. World Stroke Organization global stroke services
- 22 guidelines and action plan. *Int J Stroke* 2014;**9 Suppl A100**:4-13
- 23 25. Skolarus LE BJ, Brown DL, Freedman VA. Understanding Stroke Survivorship: Expanding the concept of
- 24 post-stroke disability. *Stroke* 2014;**45**(1):224-30
- 25 26. Zhang L, Yan T, You L, Li K. Barriers to activity and participation for stroke survivors in rural China. *Archives*
- 26 *of physical medicine and rehabilitation* 2015;**96**(7):1222-8
- 27 27. Feigin VL FM, Krishnamurthi R, Mensah GA, Connor M, Bennett DA, Moran AE, Sacco RL, Anderson L,
- 28 Truelsen T, O'Donnell M, Venketasubramanian N, Barker-Collo S, Lawes CM, Wang W, Shinohara Y, Witt
- 29 E, Ezzati M, Naghavi M, Murray C; Global Burden of Diseases, Injuries, and Risk Factors Study 2010
- 30 (GBD 2010) and the GBD Stroke Experts Group. Global and regional burden of stroke during
- 31 1990–2010: findings from the Global Burden of Disease Study 2010. *Lancet* 2014;**383**(9913):245-54
- 32 28. Hachinski V, Donnan GA, Gorelick PB, et al. Stroke: working toward a prioritized world agenda. *Stroke*
- 33 2010;**41**(6):1084-99
- 34 29. Nakibuuka J SM, Katabira E, Ddumba E, Byakika-Tusiime J, Furlan AJ. Knowledge and Perception of Stroke: A
- 35 Population-Based Survey in Uganda. *ISRN Stroke* 2014;**2014**
- 36 30. Hickey A OHA, McGee H, Donnellan C, Shelley E, Horgan F, O'Neill D. Stroke awareness in the general
- 37 population: knowledge of stroke risk factors and warning signs in older adults. *BMC Geriatr* 2009;**9**:35
- 38 31. Akiyama H HY. Knowledge of transient ischemic attack among the Japanese. *J Stroke Cerebrovasc Dis*
- 39 2013;**22**(4):457-64
- 40 32. Zeng Y HG, Yi GH, Huang YJ, Zhang QH, He LL. Knowledge of stroke warning signs and risk factors among
- 41 patients with previous stroke or TIA in China. *J Clin Nurs* 2012;**21**(19-20):2886-95
- 42 33. Hickey A HD, McGee H, Conroy R, Shelley E. Knowledge of stroke risk factors and warning signs in Ireland:
- 43 development and application of the Stroke Awareness Questionnaire (SAQ). *Int J Stroke*
- 44 2012;**7**(4):298-306

1  
2  
3  
4  
5  
6  
7  
8  
9  
10  
11  
12  
13  
14  
15  
16  
17  
18  
19  
20  
21  
22  
23  
24  
25  
26  
27  
28  
29  
30  
31  
32  
33  
34  
35  
36  
37  
38  
39  
40  
41  
42  
43  
44  
45  
46  
47  
48  
49  
50  
51  
52  
53  
54  
55  
56  
57  
58  
59  
60

---

1 34. Hachinski V. World Stroke Day Proclamation. stroke 2008;**39**:2409-20  
2 35. Tsai PC YP, Tai JJ, Lou MF. Needs of family caregivers of stroke patients: a longitudinal study of caregivers'  
3 perspectives. Patient Prefer Adherence 2015;**9**:449-57  
4  
5

For peer review only

1 AGE: EDUCATION:  
2  
3 ID: DIAGNOSIS: NIHSS SCORE:

4 The World Stroke Organization is making a Bill of Rights for stroke patients.  
5 It will help The Bill of Rights forms the basis to ensure that every patient  
6 has access to all elements of appropriate stroke care, to optimize their best  
7 chance of survival and recovery. The Stroke Bill of Rights was developed by  
8 a group of stroke survivors and caregivers from each region of the world.  
9 They need help to find out what are the most important things in their  
10 recovery. They will be very appreciated if you take 5-10 minutes to answer  
11 this survey. You need to finish all the 17 questions. This is for the patients,  
12 and the other is for the carers.

### 17 1. What is your age?

- 18  18 - 29       50 - 59       80-89  
19  30 - 39       60 - 69       90-99  
20  40 - 49       70 - 79       above 100

### 25 2. What is your sex?

- 26  male       female

### 30 3. How long has it been since you had your first stroke?

- 31  Within 3 year     3-6 years     6-9 years     9-12 years     above 12  
32 years

### 36 4. I need for information about the signs of stroke.

- 37  very agree     agree     neutral     disagree     very disagree

### 42 5. I need for a rapid diagnosis so I can be treated quickly.

- 43  very agree     agree     neutral     disagree     very disagree

### 47 6. I need for treatment by a specialized team at all atages 48 of my journey (in hospital and during rehabilitation)

- 49  very agree     agree     neutral     disagree     very disagree



1 7. I need for informations about what has happened to me and  
2 about living with stroke fo as long as I require it.

3  very agree  agree  neutral  disagree  very disagree  
4  
5  
6

7 8. I have the right to be induced in all aspects of society  
8 regardless of any disability I may have.

9  very agree  agree  neutral  disagree  very disagree  
10  
11  
12

13 9. I need for psychological supports to provide hope for the  
14 best possible recovery I can make now and into the future.

15  very agree  agree  neutral  disagree  very disagree  
16  
17  
18

19 20 10. I need for considerate care.

21  very agree  agree  neutral  disagree  very disagree  
22  
23  
24

25 11. I need for Communications with other stroke suvivors and  
26 caregivers so I may gain and provide support in my recovery  
27 from stroke.

28  very agree  agree  neutral  disagree  very disagree  
29  
30  
31  
32

33 12. I have the right receive psychological and emotional  
34 support in a form that best meets my needs.

35  very agree  agree  neutral  disagree  very disagree  
36  
37  
38

39 13. I need for treatment that is right for me as an  
40 individual considering my age, gender, culture, goals and my  
41 changing needs over time.

42  very agree  agree  neutral  disagree  very disagree  
43  
44  
45  
46

47 14. I need for support(financial or otherwise) to ensure I am  
48 cared for in the longer term.

49  very agree  agree  neutral  disagree  very disagree  
50  
51  
52  
53

1 15. I need for support to return to work and/or to other  
2 activities I may choose to participate in after my stroke.  
3

4  very agree  agree  neutral  disagree  very disagree  
5  
6

7 16. I need for treatment regardless of financial situation,  
8 gender, culture or place that I live.  
9

10  very agree  agree  neutral  disagree  very disagree  
11  
12

13 17. I need for formal and informal advocacy to assist me with  
14 access to the services I need.  
15

16  very agree  agree  neutral  disagree  very disagree  
17  
18  
19  
20  
21  
22  
23  
24  
25  
26  
27  
28  
29  
30  
31  
32  
33  
34  
35  
36  
37  
38  
39  
40  
41  
42  
43  
44  
45  
46  
47  
48  
49  
50  
51  
52  
53  
54  
55  
56  
57

STROBE Statement—Checklist of items that should be included in reports of *cross-sectional studies*

|                              | Item No | Recommendation                                                                                                                                                                                               |    |
|------------------------------|---------|--------------------------------------------------------------------------------------------------------------------------------------------------------------------------------------------------------------|----|
| <b>Title and abstract</b>    | 1       | (a) Indicate the study's design with a commonly used term in the title or the abstract                                                                                                                       | ✓  |
|                              |         | (b) Provide in the abstract an informative and balanced summary of what was done and what was found                                                                                                          | ✓  |
| <b>Introduction</b>          |         |                                                                                                                                                                                                              |    |
| Background/rationale         | 2       | Explain the scientific background and rationale for the investigation being reported                                                                                                                         | ✓  |
| Objectives                   | 3       | State specific objectives, including any prespecified hypotheses                                                                                                                                             | ✓  |
| <b>Methods</b>               |         |                                                                                                                                                                                                              |    |
| Study design                 | 4       | Present key elements of study design early in the paper                                                                                                                                                      | ✓  |
| Setting                      | 5       | Describe the setting, locations, and relevant dates, including periods of recruitment, exposure, follow-up, and data collection                                                                              | ✓  |
| Participants                 | 6       | (a) Give the eligibility criteria, and the sources and methods of selection of participants                                                                                                                  | ✓  |
| Variables                    | 7       | Clearly define all outcomes, exposures, predictors, potential confounders, and effect modifiers. Give diagnostic criteria, if applicable                                                                     | ✓  |
| Data sources/<br>measurement | 8*      | For each variable of interest, give sources of data and details of methods of assessment (measurement). Describe comparability of assessment methods if there is more than one group                         | NA |
| Bias                         | 9       | Describe any efforts to address potential sources of bias                                                                                                                                                    | ✓  |
| Study size                   | 10      | Explain how the study size was arrived at                                                                                                                                                                    | ✓  |
| Quantitative<br>variables    | 11      | Explain how quantitative variables were handled in the analyses. If applicable, describe which groupings were chosen and why                                                                                 | ✓  |
| Statistical methods          | 12      | (a) Describe all statistical methods, including those used to control for confounding                                                                                                                        | ✓  |
|                              |         | (b) Describe any methods used to examine subgroups and interactions                                                                                                                                          | ✓  |
|                              |         | (c) Explain how missing data were addressed                                                                                                                                                                  | NA |
|                              |         | (d) If applicable, describe analytical methods taking account of sampling strategy                                                                                                                           | ✓  |
|                              |         | (e) Describe any sensitivity analyses                                                                                                                                                                        | ✓  |
| <b>Results</b>               |         |                                                                                                                                                                                                              |    |
| Participants                 | 13*     | (a) Report numbers of individuals at each stage of study—eg numbers potentially eligible, examined for eligibility, confirmed eligible, included in the study, completing follow-up, and analysed            | ✓  |
|                              |         | (b) Give reasons for non-participation at each stage                                                                                                                                                         | NA |
|                              |         | (c) Consider use of a flow diagram                                                                                                                                                                           | NA |
| Descriptive data             | 14*     | (a) Give characteristics of study participants (eg demographic, clinical, social) and information on exposures and potential confounders                                                                     | ✓  |
|                              |         | (b) Indicate number of participants with missing data for each variable of interest                                                                                                                          | NA |
| Outcome data                 | 15*     | Report numbers of outcome events or summary measures                                                                                                                                                         | ✓  |
| Main results                 | 16      | (a) Give unadjusted estimates and, if applicable, confounder-adjusted estimates and their precision (eg, 95% confidence interval). Make clear which confounders were adjusted for and why they were included | ✓  |
|                              |         | (b) Report category boundaries when continuous variables were categorized                                                                                                                                    | ✓  |
|                              |         | (c) If relevant, consider translating estimates of relative risk into absolute risk for                                                                                                                      | ✓  |

|                          |    |                                                                                                                                                                            |   |
|--------------------------|----|----------------------------------------------------------------------------------------------------------------------------------------------------------------------------|---|
|                          |    | a meaningful time period                                                                                                                                                   |   |
| Other analyses           | 17 | Report other analyses done—eg analyses of subgroups and interactions, and sensitivity analyses                                                                             | ✓ |
| <b>Discussion</b>        |    |                                                                                                                                                                            |   |
| Key results              | 18 | Summarise key results with reference to study objectives                                                                                                                   | ✓ |
| Limitations              | 19 | Discuss limitations of the study, taking into account sources of potential bias or imprecision. Discuss both direction and magnitude of any potential bias                 | ✓ |
| Interpretation           | 20 | Give a cautious overall interpretation of results considering objectives, limitations, multiplicity of analyses, results from similar studies, and other relevant evidence | ✓ |
| Generalisability         | 21 | Discuss the generalisability (external validity) of the study results                                                                                                      | ✓ |
| <b>Other information</b> |    |                                                                                                                                                                            |   |
| Funding                  | 22 | Give the source of funding and the role of the funders for the present study and, if applicable, for the original study on which the present article is based              | ✓ |

\*Give information separately for exposed and unexposed groups.

**Note:** An Explanation and Elaboration article discusses each checklist item and gives methodological background and published examples of transparent reporting. The STROBE checklist is best used in conjunction with this article (freely available on the Web sites of PLoS Medicine at <http://www.plosmedicine.org/>, Annals of Internal Medicine at <http://www.annals.org/>, and Epidemiology at <http://www.epidem.com/>). Information on the STROBE Initiative is available at [www.strobe-statement.org](http://www.strobe-statement.org).

# BMJ Open

## Needs and rights awareness of stroke survivors and caregivers: a cross-sectional, single-centre questionnaire survey

|                                 |                                                                                                                                                                                                                                                                                                                                                                                                                                                                                                                                                                                                                       |
|---------------------------------|-----------------------------------------------------------------------------------------------------------------------------------------------------------------------------------------------------------------------------------------------------------------------------------------------------------------------------------------------------------------------------------------------------------------------------------------------------------------------------------------------------------------------------------------------------------------------------------------------------------------------|
| Journal:                        | <i>BMJ Open</i>                                                                                                                                                                                                                                                                                                                                                                                                                                                                                                                                                                                                       |
| Manuscript ID                   | bmjopen-2016-013210.R2                                                                                                                                                                                                                                                                                                                                                                                                                                                                                                                                                                                                |
| Article Type:                   | Research                                                                                                                                                                                                                                                                                                                                                                                                                                                                                                                                                                                                              |
| Date Submitted by the Author:   | 19-Feb-2017                                                                                                                                                                                                                                                                                                                                                                                                                                                                                                                                                                                                           |
| Complete List of Authors:       | Li, Xin; The Second Hospital of Tianjin Medical University, Tianjin, China , Neurology<br>Xia, Xiaoshuang; The Second Hospital of Tianjin Medical University, Tianjin, China , Neurology<br>Wang, Peilu; The Second Hospital of Tianjin Medical University, Tianjin, China , Neurology<br>Zhang, Shuting; Stroke Clinical Research Unit; West China Hospital, Sichuan University, Chengdu, China, Neurology<br>Liu, M; Stroke Clinical Research Unit; West China Hospital, Sichuan University, Chengdu, China, Neurology<br>Wang, Lin; The Second Hospital of Tianjin Medical University, Tianjin, China , Geratology |
| <b>Primary Subject Heading</b>: | Neurology                                                                                                                                                                                                                                                                                                                                                                                                                                                                                                                                                                                                             |
| Secondary Subject Heading:      | Public health, Patient-centred medicine, Mental health, Medical education and training                                                                                                                                                                                                                                                                                                                                                                                                                                                                                                                                |
| Keywords:                       | needs, patients rights, Stroke < NEUROLOGY, caregivers, survey                                                                                                                                                                                                                                                                                                                                                                                                                                                                                                                                                        |
|                                 |                                                                                                                                                                                                                                                                                                                                                                                                                                                                                                                                                                                                                       |

SCHOLARONE™  
Manuscripts

1  
2  
3  
4 1  
5  
6 2 **Needs and rights awareness of stroke survivors and caregivers: a**  
7  
8  
9 3 **cross-sectional, single-centre questionnaire survey**  
10  
11 4

12  
13  
14 5 Xin Li,<sup>1</sup> Xiaoshuang Xia,<sup>1</sup> Peilu Wang,<sup>1</sup> Shuting Zhang,<sup>2</sup> Ming Liu,<sup>2</sup> Lin Wang<sup>3</sup>  
15

16 6 <sup>1</sup>Department of Neurology, The Second Hospital of Tianjin Medical University, Tianjin,  
17  
18  
19 7 China

20  
21 8 <sup>2</sup>Stroke Clinical Research Unit, Department of Neurology, West China Hospital, Sichuan  
22  
23  
24 9 University, Chengdu, China

25  
26 10 <sup>3</sup>Department of Geratology, The Second Hospital of Tianjin Medical University and Tianjin  
27  
28  
29 11 Geriatric Institute, Tianjin, China

30  
31 12 Correspondence to:

32  
33  
34 13 Xin Li, MD, PhD, Department of Neurology, The Second Hospital of Tianjin Medical  
35  
36 14 University, No 22, Pingjiang Road, Hexi District, Tianjin 300211, China, [lixin@126.com](mailto:lixin@126.com)

37  
38  
39 15 or Ming Liu, MD, PhD, Stroke Clinical Research Unit, Department of Neurology, West China  
40  
41 16 Hospital, Sichuan University, No 37, Guo Xue Xiang, Chengdu 610041, China,

42  
43  
44 17 [wypmh@hotmail.com](mailto:wypmh@hotmail.com),  
45

46  
47 18  
48  
49 19 Key words: needs, patient rights, stroke, caregivers, survey

50  
51 20 Word count: 4623  
52  
53  
54 21

1  
2  
3  
4 1 **ABSTRACT**

5  
6 2 **Objectives:** The needs and rights awareness of stroke survivors have not been reported in  
7  
8  
9 3 China. This study investigated the needs and rights awareness of stroke survivors and  
10  
11 4 caregivers in Tianjin, China.

12  
13  
14 5 **Setting:** A survey launched by the World Stroke Organization (WSO) was conducted in  
15  
16 6 Tianjin, China. The questionnaire included demands for psychological support, treatment and  
17  
18  
19 7 care, social support, and information. Stroke survivors and their caregivers were interviewed  
20  
21 8 face to face for the questionnaire. Between June 2014 and February 2015, stroke survivors  
22  
23  
24 9 were invited to participate if they were over 18 years old and had experienced a stroke.  
25  
26 10 Exclusion criteria were patients who had disorders of consciousness, significant cognitive  
27  
28  
29 11 impairment, aphasia, communication difficulties or psychiatric disorders. Only caregivers  
30  
31 12 who were family members of the patients were chosen. Paid caregivers were excluded.

32  
33  
34 13 **Participants:** Two hundred forty-eight stroke survivors and 212 caregivers were enrolled.

35  
36 14 **Primary outcome measures:** The correlations between levels of needs and potential effect  
37  
38  
39 15 factors were analysed. Levels of different needs were compared by age, gender and time  
40  
41 16 since stroke.

42  
43  
44 17 **Results:** Among the cohort, 95.6% stroke survivors and 92.5% caregivers agreed to each  
45  
46 18 question in the questionnaire. The participants prioritised the needs for psychological support  
47  
48  
49 19 (99.4%), treatment and care (98.6%), social support (98%), and information (96.2%). The  
50  
51 20 total score was negatively correlated with age ( $r=-0.255$ ,  $P<0.01$ ). Patients under 65 years old  
52  
53  
54 21 had higher scores than those 65 years or older ( $P<0.01$ ), while male patients had higher  
55  
56 22 scores than female patients ( $P<0.01$ ).

1  
2  
3  
4 1 **Conclusions:** The needs for psychological and emotional support, individual treatment, social  
5  
6 2 support and information about stroke were eagerly reported by most survivors. The Bill of  
7  
8 3 Rights must be recognised by the Chinese society, providing appropriate stroke care to every  
9  
10 4 patient to optimise stroke outcomes.  
11  
12  
13  
14  
15

### 16 **Strengths and limitations of this study**

17  
18  
19 7 ■ Stroke survivors and caregivers did not have their own bill of rights when this study was  
20  
21 8 performed, and their needs and rights awareness have not been reported in China.  
22

23  
24 9 ■ The demands for psychological and emotional support, individual treatment, social  
25  
26 10 support and information were eagerly reported by most stroke survivors.  
27

28  
29 11 ■ The stroke survivors in China had the strongest demand for emotional and psychological  
30  
31 12 support, which should be recognised.  
32

33  
34 13 ■ Limitations include potential bias due to the exclusion of patients with severe language  
35  
36 14 or cognitive impairment. The number of participants was also limited. Further  
37  
38 15 multiple-centre and large-sample research studies may be needed.  
39  
40  
41  
42  
43

### 44 **INTRODUCTION**

45  
46 18 Stroke is a major cause of death and disability worldwide. The burden of stroke is  
47  
48 19 particularly serious in Asia[1], and its mortality is higher than that in Europe or North  
49  
50 20 America[2]. In China, it is the leading cause of death and disability[3]. Stroke survivors cope  
51  
52 21 with significant physical, cognitive and emotional deficits, and 25% to 74% of these  
53  
54 22 survivors require some assistance or are fully dependent on their caregivers for activities of  
55  
56  
57  
58  
59  
60



1  
2  
3  
4 1 daily living[4]. Although much has been done to control the disease, the stroke survivors'  
5  
6 2 needs and rights have not received adequate attention. Bills of patient rights for several  
7  
8  
9 3 diseases have been developed to achieve higher degrees of patient satisfaction, such as for  
10  
11 4 cancer[5] and chronic obstructive pulmonary disease[6]. Stroke survivors did not have their  
12  
13  
14 5 own bill of rights until the World Stroke Organization (WSO) realised this urgent need and  
15  
16 6 framed a global bill of rights for stroke patients[7]. The WSO has numerous strategies to  
17  
18  
19 7 increase stroke awareness, including influencing policies for stroke prevention and improved  
20  
21 8 health services, providing education, and fostering the development of systems and  
22  
23  
24 9 organisations for the long-term support of stroke survivors and their families[8]. To determine  
25  
26 10 what stroke survivors and caregivers require, the WSO has launched an online survey  
27  
28  
29 11 (<https://www.surveymonkey.com/s/WSOStrokeSurvivor-Chinese> and  
30  
31 12 <https://www.surveymonkey.com/s/WSOStrokeCarer-Chinese>).

32  
33  
34 13 This survey was used in this study to investigate the needs and rights awareness in  
35  
36 14 Chinese stroke survivors and caregivers. This study was aimed to provide a reference for the  
37  
38  
39 15 improvement of stroke-related laws and bills, which could provide the stroke survivor with  
40  
41 16 physical, mental and emotional support.  
42  
43  
44 17

## 45 46 18 ***METHODS***

### 47 48 49 19 ***Study population***

50  
51  
52 20 This study was approved by our local Ethics Committee at the Second Hospital of  
53  
54 21 Tianjin Medical University. All patients and their caregivers gave informed consent.  
55

56 22 Between June 2014 and February 2015, 248 stroke survivors and 212 caregivers from  
57  
58  
59  
60

1 the Stroke Clinical Registry and Follow-up Database of the Second Hospital of Tianjin  
2 Medical University were enrolled. According to the Kendall sample size determination  
3 method of the questionnaire, at least 70-140 samples were needed; therefore, we recruited  
4 more participants than the sample size determined. Stroke survivors were invited to  
5 participate if they were over 18 years old, had experienced stroke and agreed to participate in  
6 the study. The exclusion criteria were patients who had disorders of consciousness,  
7 significant cognitive impairment, aphasia, communication difficulties or psychiatric  
8 disorders.

9 Caregivers who had been taking care of the stroke patients who met the above criteria  
10 were recruited. Only caregivers who were family members of the patients were chosen. Paid  
11 caregivers were excluded.

### 12 ***Development of the survey***

13 The questionnaire was adapted from that designed by the WSO. Stroke survivors and  
14 caregivers were interviewed face to face during the patients' follow-up by well-trained  
15 neurologists who were not the patients' treating doctors.

16 The final questionnaire included 17 questions covering age, gender, level of education,  
17 time since the first stroke, and demands for treatment and information about stroke and  
18 psychological and social support. Fourteen of the questions had five choices for each question.  
19 The five choices were strongly agree, agree, neutral, disagree and strongly disagree. The  
20 Likert 5-grade score method was used to assign 1-5 points; higher scores indicated a greater  
21 degree of demand. The purpose of the survey and the procedure were explained fully to all  
22 participants.

1 The questionnaire translated to Chinese was tested again for the reliability in our  
2 population. The scales reliability of the stroke survivors' questionnaire was assessed with a  
3 total Cronbach's  $\alpha$  of 0.910, corrected by inter-item correlation above 0.70. The scales  
4 reliability of the stroke caregivers' questionnaire was assessed with a total Cronbach's  $\alpha$  of  
5 0.817, corrected by inter-item correlation f above 0.70. The Cronbach's  $\alpha$  values were good  
6 for all scales for the study.

### 8 ***Statistical Analysis***

9 Frequencies and proportions were used to summarize levels of answers. The Spearman  
10 Rank Relational Coefficient was used to analyze the correlations between levels of needs and  
11 potential effect factors. Levels of different needs were compared by age, gender, and time  
12 since stroke. Categorical variables are displayed as frequencies and percentages. Categorical  
13 variables were analyzed using a chi-square ( $\chi^2$ ) test. Comparisons between groups were made  
14 using the Mann–Whitney  $U$  test. Statistical tests were performed at the 95% confidence level.

## 16 ***RESULTS***

### 17 ***Study population***

18 The descriptive characteristics of stroke survivors and caregivers are summarised in  
19 Table 1.

20 The 248 stroke survivors included 123 women and 125 men between the ages of 33 and  
21 92, with a mean age of 69.5. The 212 caregivers included 117 women and 95 men between  
22 the ages of 20 and 88, with a mean age of 52.6. Stroke survivors they cared for were aged

1 between 45 and 92 years, with a mean age of 72.2.

2 **Table 1 Characteristics of stroke survivors and caregivers**

|                   | Stroke Survivors | Stroke Caregivers |
|-------------------|------------------|-------------------|
|                   | N (%)            | N (%)             |
| Total             | 248              | 212               |
| Age               |                  |                   |
| <45               | 3(1.2%)          | 49(23.1%)         |
| 45-54             | 29(11.7%)        | 69(32.5%)         |
| 55-64             | 54(21.8%)        | 65(30.7%)         |
| 65-74             | 63(25.4%)        | 21(9.9%)          |
| 75-84             | 73(29.4%)        | 5(2.4%)           |
| ≥85               | 26(10.5%)        | 3(1.4%)           |
| Gender            |                  |                   |
| Male              | 125(50.4%)       | 95(44.8%)         |
| Female            | 123(49.6%)       | 117 (55.2%)       |
| Time since stroke |                  |                   |
| <1y               | 170(68.5%)       | 132 (62.3%)       |
| 1-3y              | 41(16.5%)        | 37(17.5%)         |
| 4-7y              | 13(5.2%)         | 22(10.4%)         |
| 8-10y             | 6(2.4%)          | 8(3.8%)           |
| >10y              | 18(7.3%)         | 13(6.1%)          |
| Education         |                  |                   |
| <3y               | 19(7.7%)         | 2(0.9%)           |
| 3-6y              | 44(17.7%)        | 13(6.1%)          |
| 6-9y              | 70(28.2%)        | 56(26.4%)         |
| 9-12y             | 88(35.5%)        | 93(43.9%)         |
| >12y              | 27(10.9%)        | 48(22.6%)         |
| Type of stroke    |                  |                   |
| Ischemic stroke   | 192(77.4%)       | 170(80.2%)        |

|              |                    |            |            |
|--------------|--------------------|------------|------------|
|              | Hemorrhagic stroke | 56(22.6%)  | 42(19.8%)  |
| NIHSS* Score |                    |            |            |
|              | <4                 | 115(46.4%) | 90(42.5%)  |
|              | 4-15               | 127(51.2%) | 116(54.7%) |
|              | >15                | 6(2.4%)    | 6(2.8%)    |

\* NIHSS: National institutes of Health Stroke Scale

Among the cohort, 95.6% of the stroke survivors approved of each question in the questionnaire. The results of the survey showed that participants prioritised the need for psychological support (99.4%), treatment and care (98.6%), social support (98%) and information (96.2%). The total score and every aspect of need was negatively correlated with age ( $P < 0.01$ ). There were no correlations between needs and type of stroke or National Institutes of Health Stroke Scale score ( $P > 0.05$ ). (Table 2)

**Table 2 The correlations between levels of needs and potential effect factors**

|                   | Total  |        | Psychological support |       | Information |        | Treatment and care |       | Social support |        |
|-------------------|--------|--------|-----------------------|-------|-------------|--------|--------------------|-------|----------------|--------|
|                   | rho    | P      | Rho                   | P     | Rh          | P      | rho                | P     | Rho            | P      |
| Age               | -0.255 | <0.001 | -0.211                | 0.001 | -0.221      | <0.001 | -0.197             | 0.002 | -0.245         | <0.001 |
| Gender            | -0.14  | 0.027  | -0.184                | 0.004 | 0.052       | 0.419  | -0.130             | 0.041 | -0.131         | 0.039  |
| Time since stroke | -0.044 | 0.487  | 0.095                 | 0.135 | -0.063      | 0.324  | -0.127             | 0.046 | -0.029         | 0.647  |
| Education         | 0.099  | 0.121  | -0.000                | 0.998 | 0.051       | 0.427  | -0.067             | 0.293 | 0.010          | 0.879  |
| Type of stroke    | -0.089 | 0.162  | -0.017                | 0.791 | 0.075       | 0.242  | -0.044             | 0.494 | 0.005          | 0.932  |
| NIHSS Score       | -0.088 | 0.169  | 0.010                 | 0.877 | -0.059      | 0.352  | -0.087             | 0.172 | -0.036         | 0.578  |

The total needs and every aspect of the needs of patients under 65 years old were

1 higher than those of older patients (65 years or older) ( $P<0.05$ ). Moreover, male patients had  
 2 higher scores for total needs, psychological needs, needs for treatment and care and needs for  
 3 social support than female patients ( $P<0.05$ ) (Table 3 and Table 4).

4 **Table 3. Needs of stroke survivors by age**

|     | Total        | Psychological<br>support | Information  | Treatment<br>and care | Social<br>support |
|-----|--------------|--------------------------|--------------|-----------------------|-------------------|
| <65 | 4.7(4.1-5.0) | 5.0(4.0-5.0)             | 4.5(4.0-5.0) | 4.6(4.0-5.0)          | 4.6(4.0-5.0)      |
| ≥65 | 4.2(4.0-4.7) | 4.0(4.0-5.0)             | 4.0(4.0-4.5) | 4.2(4.0-4.8)          | 4.0(4.0-4.8)      |
| Z   | -4.179       | -3.314                   | -3.477       | -3.090                | -3.855            |
| P   | <0.001       | 0.001                    | 0.001        | 0.002                 | <0.001            |

5  
 6 **Table 4. Needs of rural stroke survivors by gender**

|        | Total        | Psychological<br>support | Information  | Treatment<br>and care | Social<br>support |
|--------|--------------|--------------------------|--------------|-----------------------|-------------------|
| Male   | 4.3(4.0-5.0) | 4.5(4.0-5.0)             | 4.0(4.0-5.0) | 4.4(4.0-5.0)          | 4.4(4.0-5.0)      |
| Female | 4.1(4.0-4.9) | 4.0(4.0-5.0)             | 4.0(4.0-5.0) | 4.2(4.0-4.8)          | 4.2(4.0-4.8)      |
| Z      | -2.210       | -2.893                   | -0.810       | -2.043                | -2.063            |
| P      | 0.027        | 0.004                    | 0.418        | 0.041                 | 0.039             |

7  
 8  
 9 **Caregivers' opinion**

10 Among the caregivers, 92.5% approved of each question in the questionnaire. Timely  
 11 diagnosis and treatment appeared to be uppermost in caregivers' minds (99.1%). They also

1 cared about financial support to aid in the patient's recovery (98.6%). The total score of  
2 caregivers was negatively correlated with the age of the caregivers ( $r=-0.197$ ,  $P=0.004$ ),  
3 while positively correlated with levels of education ( $r=2.259$ ,  $P<0.001$ ). No correlation was  
4 found between the scores and gender or time that the patients they cared for experienced their  
5 first stroke ( $P>0.05$ ).

## 6 7 **DISCUSSION**

8 In this study, 95.6% stroke survivors and 92.5% of caregivers approved of each question,  
9 which showed that most patients were eager for a formal declaration of their rights. The  
10 Global Stroke Bill of Rights, developed by the WSO, sets out the right of each stroke  
11 survivor to: receive the best stroke care, be informed and prepared, and be supported in their  
12 recovery[9].

### 13 ***Factors that influenced the awareness of needs and rights***

14 This survey showed that patients under 65 years old had more needs than younger  
15 patients. The needs and awareness of rights were negatively correlated with the age of the  
16 patients. Because of different social and domestic duties between younger and older patients,  
17 younger patients yearned for a higher quality of life after experiencing stroke. They seemed  
18 keener to acquire knowledge of stroke and appropriate therapies as well as emotional and  
19 social support. This result did not match the findings of a similar survey conducted in the  
20 UK[10], which reported that there was no relationship between needs and age. Patients over  
21 65 years of age constituted 47.5% of the subjects in the British survey, while in this survey,  
22 65.3% of the patients were above 65 years old. In addition, unlike other surveys, this survey

1 found that male patients had a stronger demand for and were more conscious of their rights.  
2 This phenomenon could be due to the traditional thought of "male superiority to female" in  
3 Chinese tradition society. A study in China showed that there was a sex difference in the  
4 social participation domain in Chinese stroke patients, and male patients had higher social  
5 desires[11].

6 Our study is consistent with the UK study[10], where no significant correlation was  
7 found between the total scores and levels of education. There was also no correlation between  
8 the needs and the time since the first stroke. Similarly, Walsh et al.[12] found no significant  
9 difference in time since stroke between those who reported multiple unmet needs and those  
10 who reported one or no unmet needs.

### 11 *Psychological support*

12 As shown in our results, the questions related to psychological needs received the  
13 highest score and the highest support rate, suggesting that stroke survivors in China had the  
14 strongest demand for emotional and psychological support. A sudden attack and poor  
15 prognosis had an appreciable effect on the psychology of stroke survivors. Some surveys  
16 have demonstrated that emotional problems among stroke survivors would be prejudicial to  
17 treatment and rehabilitation after stroke[13-15]. As physicians, we usually pay more attention  
18 to treating the disease, rather than the emotional needs of the patients. A national survey  
19 carried out in Ireland showed that 77% of respondents suffered from emotional problems  
20 after stroke, while only 10% of the respondents had received community psychological  
21 service[12]. Since emotional and psychological needs are liable to be neglected, post-stroke  
22 depression was a common complication which seriously impairs quality of life[16 17].



1  
2  
3  
4 1 Psychological expertise and formal psychological support were needed by stroke  
5  
6 2 survivors[18]. The newest version of the Chinese Stroke Guidelines goes further,  
7  
8 3 recommending psychological support.

#### 4 *Needs for treatment and care*

5       The needs for diagnosis, treatment, care and rehabilitation were second only to the  
6 need for psychological support. The strategies should vary depending on the cause,  
7 pathophysiological mechanisms, severity and prognosis to reduce the risk of a recurrent  
8 event[19]. Patients should be assessed for individual risks, such as atrial fibrillation, in which  
9 case antithrombotic therapy oral anticoagulation may be needed for effective stroke  
10 prevention[20]. Most stroke survivors suffer from different residual deficits; individualised  
11 and optimised care is also needed during inpatient and in chronic care and end-of-life  
12 settings[4]. Rehabilitation was usually ignored in busy clinical settings prior to discharge  
13 from hospital in China, and there was also a lack of post-discharge rehabilitation services.  
14 The patients perceived nurse-led coordination of rehabilitation and ongoing changes of  
15 rehabilitation goals in different stages of recovery[21]. A considerable unmet need for  
16 poststroke rehabilitation services was also found in other low- and middle-income countries,  
17 such as India[22]. As stroke is an emergency and disastrous disease, a timely and appropriate  
18 diagnosis and therapy made by specialised neurologists is vital to the survival and recovery of  
19 the patients. A well-organised continuing medical education system for community doctors  
20 and non-neurologists covering stroke should be established in China[23], as well as a stroke  
21 services system in accordance with the WSO Global Stroke Services Guidelines and Action  
22 Plan[24], reminding us that stroke awareness, education, prevention and treatment should

1  
2  
3  
4 1 always be feasible.  
5

6 2 ***Social support***  
7

8  
9 3 In this study, the stroke survivors exhibited a desire to return to their full range of  
10  
11 4 activities and roles they had before their stroke, playing an active role in their own lives and  
12  
13 5 in their community. However, there is often a gap between their aspiration and what they  
14  
15 6 actually experience. A cross-sectional study showed that stroke survivors had more  
16  
17 7 participation restrictions[25]. Physical/structural and services/assistance were considered the  
18  
19 8 dominant barriers to and participation in activities of daily life for stroke survivors in  
20  
21 9 China[26]. This research also found that needs had a negative correlation with age. In Ireland,  
22  
23 10 only 23% of those under the age of 66 obtained a full- or part-time job after stroke[11]. Those  
24  
25 11 under retirement age would face a higher financial burden and social responsibility. The  
26  
27 12 age-specific burden of stroke in low-income and middle-income countries is greater than in  
28  
29 13 high-income countries[27]. In our survey, 97.6% of all the stroke survivors expected to  
30  
31 14 receive financial support, much higher than in the Irish survey[11]. Social support should be  
32  
33 15 provided to stroke survivors, including barrier-free facilities and financial support;  
34  
35 16 furthermore, the social security system for stroke survivors needs to be improved in  
36  
37 17 developing countries such as China.  
38  
39  
40  
41  
42  
43  
44

45  
46 18 ***Information needs***  
47

48  
49 19 In the present study, most individuals wanted more information about the signs of stroke,  
50  
51 20 as well as what changes they would face afterwards. With more knowledge of stroke, they  
52  
53 21 could identify the disease immediately, resulting in a decrease in the time from symptom  
54  
55 22 onset to hospital arrival and increase in the number of patients who may receive appropriate  
56  
57  
58  
59  
60

1  
2  
3  
4 1 interventions[28]. Knowing the individual's abilities and limitations would help them to  
5  
6 2 prepare adequately for the future. Although stroke is a devastating disease for the individual,  
7  
8 3 family and society, many times their knowledge about stroke goes unheeded. Individuals had  
9  
10 4 an extremely limited knowledge of stroke, which was also reported in other countries[29-32].  
11  
12 5 A survey among patients with previous stroke or transient ischemic attack in China showed  
13  
14 6 that only 3.3% of patients knew all the stroke warning signs, and only 9.2% indicated that  
15  
16 7 they would seek emergency service[32]. In this study, we also found that younger patients  
17  
18 8 had a stronger need to know about the changes they would face after stroke. Stroke survivors  
19  
20 9 had to adapt to changes in their bodies as a result of stroke and adjust their expectations,  
21  
22 10 including roles within the home and community, particularly for those of working age.  
23  
24 11 Another discovery in our research was that as the level of education increased, so did the  
25  
26 12 request for more information on stroke. Well-educated patients had the desire to learn all they  
27  
28 13 could about stroke. Those with the least understanding of stroke were participants in an Irish  
29  
30 14 survey that only had a primary level of education[33].

31  
32  
33  
34  
35  
36  
37  
38  
39 15 Educational strategies to increase stroke knowledge are urgently needed to combat and  
40  
41 16 prevent disease. We have made efforts to educate physicians and patients about stroke to  
42  
43 17 improve the recognition of this condition in China, especially in our hospital. Educational  
44  
45 18 activities have been held every world stroke day over the past few years and once a month  
46  
47 19 this year. Local and regional healthcare workers should put a high premium on health  
48  
49 20 education about stroke, not only to meet the needs of patients, but also to disseminate the  
50  
51 21 knowledge to the public, policymakers and health professionals[34].  
52  
53  
54  
55

56 22 ***The stroke caregivers' opinions***  
57  
58  
59  
60

1  
2  
3  
4 1 A stroke in the family can cause many shifts, whether it is relationship dynamics,  
5  
6 2 finances, home modifications or role changes. The views of caregivers of stroke survivors  
7  
8  
9 3 would provide a valuable reference about the needs and rights of these patients, as the  
10  
11 4 caregivers provide physical and psychological support in the daily life of stroke survivors.  
12  
13  
14 5 Not consistent with the stroke survivors, the caregivers' ultimate concern was treatment and  
15  
16 6 financial support, which revealed the heavy burden the family suffered due to stroke and need  
17  
18 7 for social support. The scores for these questions were negatively correlated to their age,  
19  
20  
21 8 while positively correlated to their level of education. A longitudinal study of caregivers'  
22  
23 9 perspectives found that family caregivers expected to obtain assistance and care-related  
24  
25 10 information[35]. Providing caregivers with relevant information and counseling would be  
26  
27  
28 11 beneficial to the recovery and rehabilitation of stroke survivors.

### 31 ***Limitations***

32  
33  
34 13 First, patients who were not able to express their views due to severe language or  
35  
36 14 cognitive impairment were excluded from the present study. The results could not reflect their  
37  
38  
39 15 needs, which may lead to some bias. Secondly, nearly 70% of stroke survivors who  
40  
41 16 participated in this survey experienced their stroke less than one year ago; therefore, their  
42  
43  
44 17 long-term needs might not have been met accurately. Finally, the number of participants was  
45  
46 18 limited, and data were only collected from one site, which may limit the generalisability of  
47  
48  
49 19 our results. In addition, we did not use in-depth interviews or focus groups to explore the  
50  
51 20 reasons behind the patients' needs. Further multiple-centre and large-sample research studies  
52  
53  
54 21 may be needed in the future to explore the needs of stroke survivors using these techniques.

### 56 ***Conclusion***

1 The demands of psychological support, treatment and care, social support and  
2 information about stroke in China were much more than we expected. Stroke services should  
3 consider each individual stroke survivor's needs for psychological and physical care in the  
4 whole course of their condition, from the onset of stroke through rehabilitation and  
5 reintegration into the community, which requires a more concerted effort across specialists in  
6 stroke units, communities and social supports. The Bill of Rights must also be recognised by  
7 Chinese society, providing appropriate stroke care to every patient to optimise stroke  
8 outcomes.

### 9 **Acknowledgments**

10 The authors would like to acknowledge the World Stroke Organization (WSO), which  
11 allowed us to adapt the questionnaire about the rights of stroke survivors and caregivers. We  
12 acknowledge the doctors in the Department of Neurology, the Second Hospital of Tianjin  
13 Medical University, who gave us help to complete this study.

### 14 **Contributorship statement**

15 Xin Li contributed conceived and designed the study and revised the manuscript. Ming Liu  
16 conceived of the study and revised the manuscript. Xin Li and Ming Liu are  
17 co-correspondence authors. Xiaoshuang Xia analysed the data and wrote the manuscript.  
18 Peilu Wang collected the data from the survey. Shuting Zhang helped collect the data. Lin  
19 Wang helped perform the analysis with constructive discussions.

### 20 **Competing interests**

21 None declared.

### 22 **Funding**

1 This work is supported by the key project in the Science and Technology Foundation of  
2 Tianjin Health and Family Planning [15KG136] and the Natural Science Foundation of  
3 Tianjin[16JCYBJC25500].

#### 4 **Data sharing statement**

5 No additional data are available.

#### 6 **Disclosures:**

7 None

#### 8 **References**

- 9 1. Bo Norrvig BK. The global burden of stroke and need for a continuum of care. *Neurology* 2013;**80**(Suppl  
10 2):S5-S12
- 11 2. JS K. Stroke in Asia: a global disaster. *International Journal of Stroke* 2014;**9**(7):856-57
- 12 3. Qian Jia L-PL, Yong-Jun Wang. Stroke in China. *Clinical and Experimental Pharmacology and Physiology*  
13 2010;**37**:259-64
- 14 4. Miller EL ML, Richards L, Zorowitz RD, Bakas T, Clark P & Billinger SA. Comprehensive overview of nursing and  
15 interdisciplinary rehabilitation care of the stroke patient: a scientific statement from the American  
16 Heart Association. *Stroke* 2010;**41**:2402-48
- 17 5. Lawler M LCT, Banks I, Conte P, De Lorenzo F, Meunier F, Pinedo HM, Selby P, Murphy MJ, Johnston PG;  
18 European Cancer Concord (ECC). A Bill of Rights for patients with cancer in Europe. *Lancet Oncol*  
19 2014;**15**(3):258-60
- 20 6. L. N. A Bill of "Rights" for patients with COPD: the "right" therapy for the "right" patient at the "right" time.  
21 *Thorax* 2010;**65**(1):2-3
- 22 7. Damrow J, Gaarder K, Chopra S, et al. Global stroke bill of rights. *Int J Stroke* 2014;**9**(8):964 doi:  
23 10.1111/ijvs.12399[published Online First: Epub Date]].
- 24 8. Davis S, Norrvig B. World Stroke Day: one world voice for stroke. *Int J Stroke* 2013;**8** Suppl **A100**:2-3 doi:  
25 10.1111/ijvs.12185[published Online First: Epub Date]].
- 26 9. Rights TftGBo. World stroke organization web site.  
27 [http://www.world-stroke.org/newsletter/latest-updates/18-news/latest-updates/261-toolkit-for-the-gl](http://www.world-stroke.org/newsletter/latest-updates/18-news/latest-updates/261-toolkit-for-the-global-bill-of-rights)  
28 [obal-bill-of-rights](http://www.world-stroke.org/newsletter/latest-updates/18-news/latest-updates/261-toolkit-for-the-global-bill-of-rights):Accessed November 23, 2015.
- 29 10. McKeivitt C FN, Redfern J, Sheldenkar A, Crichton S, Rudd AR, Forster A, Young J, Nazareth I, Silver LE,  
30 Rothwell PM, Wolfe CD. Self-reported long-term needs after stroke. *Stroke* 2011;**42**(5):1398-403
- 31 11. Wu X, Min L, Cong L, Jia Y, Liu C, Zhao H, Liu P, Luo Y. Sex differences in health-related quality of life among  
32 adult stroke patients in Northeastern China. *J Clin Neurosci* 2014; **21**(6):957-61
- 33 12. Walsh ME GR, Loughnane C, Macey C, Horgan NF. Community re-integration and long-term need in the first  
34 five years after stroke: results from a national survey. *Disabil Rehabil* 2014;**13**:1-5
- 35 13. Chau JP TD, Chang AM, Woo J, Twinn S, Cheung SK, Kwok T. Depression among Chinese stroke survivors six  
36 months after discharge from a rehabilitation hospital. *J Clin Nurs* 2010;**19**(21-22):3042-50

14. Ekstam L JU, Guidetti S, Eriksson G, Ytterberg C. The combined perceptions of people with stroke and their carers regarding rehabilitation needs 1 year after stroke: a mixed methods study. *BMJ Open* 2015;**5**(2):e006784
15. Matsuzaki S HM, Yuki S, Koyama A, Hirata Y, Ikeda M. The relationship between post-stroke depression and physical recovery. *J Affect Disord* 2015;**176**:56-60
16. Park GY IS, Oh CH, Lee SJ, Pae CU. The association between the severity of poststroke depression and clinical outcomes after first-onset stroke in Korean patients. *Gen Hosp Psychiatry* 2015;**37**(3):245-50
17. Broomfield NM QT, Abdul-Rahim AH, Walters MR, Evans JJ. Depression and anxiety symptoms post-stroke/TIA: prevalence and associations in cross-sectional data from a regional stroke registry. *BMC Neurol* 2014;**14**:198
18. Harrison M, Ryan T, Gardiner C, Jones A. Psychological and emotional needs, assessment, and support post-stroke: a multi-perspective qualitative study. *Top Stroke Rehabil* 2016;**16**:1-7
19. Kernan WN OB, Black HR, Bravata DM, Chimowitz MI, Ezekowitz MD, Fang MC, Fisher M, Furie KL, Heck DV, Johnston SC, Kasner SE, Kittner SJ, Mitchell PH, Rich MW, Richardson D, Schwamm LH, Wilson JA; American Heart Association Stroke Council, Council on Cardiovascular and Stroke Nursing, Council on Clinical Cardiology, and Council on Peripheral Vascular Disease. Guidelines for the prevention of stroke in patients with stroke and transient ischemic attack: a guideline for healthcare professionals from the American Heart Association/American Stroke Association. *Stroke* 2014;**45**(7):2160-236
20. Lip GY LD. Stroke prevention in atrial fibrillation: a systematic review. *JAMA* 2015;**313**(19):1950-62
21. Chen L, Xiao LD, De Bellis A. First-time stroke survivors and caregivers' perceptions of being engaged in rehabilitation. *J Adv Nurs* 2016;**72**(1):73-84
22. Kamalakannan S, Gudlavalleti Venkata M, Prost A, Natarajan S, Pant H, Chitalurri N, Goenka S, Kuper H. Rehabilitation Needs of Stroke Survivors After Discharge From Hospital in India. *Arch Phys Med Rehabil* 2016;**97**(9):1526-1532.e9
23. Niu JW YJ, Gao S, Xu WH. Low awareness of stroke guidelines and preference for Chinese herbs in community physicians: a national survey in China. *Ann Transl Med* 2014;**2**(8):76
24. Lindsay P, Furie KL, Davis SM, Donnan GA, Norrving B. World Stroke Organization global stroke services guidelines and action plan. *Int J Stroke* 2014;**9 Suppl A100**:4-13
25. Skolarus LE BJ, Brown DL, Freedman VA. Understanding Stroke Survivorship: Expanding the concept of post-stroke disability. *Stroke* 2014;**45**(1):224-30
26. Zhang L, Yan T, You L, Li K. Barriers to activity and participation for stroke survivors in rural China. *Archives of physical medicine and rehabilitation* 2015;**96**(7):1222-8
27. Feigin VL FM, Krishnamurthi R, Mensah GA, Connor M, Bennett DA, Moran AE, Sacco RL, Anderson L, Truelsen T, O'Donnell M, Venketasubramanian N, Barker-Collo S, Lawes CM, Wang W, Shinohara Y, Witt E, Ezzati M, Naghavi M, Murray C; Global Burden of Diseases, Injuries, and Risk Factors Study 2010 (GBD 2010) and the GBD Stroke Experts Group. Global and regional burden of stroke during 1990–2010: findings from the Global Burden of Disease Study 2010. *Lancet* 2014;**383**(9913):245-54
28. Hachinski V, Donnan GA, Gorelick PB, et al. Stroke: working toward a prioritized world agenda. *Stroke* 2010;**41**(6):1084-99
29. Nakibuuka J SM, Katabira E, Ddumba E, Byakika-Tusiime J, Furlan AJ. Knowledge and Perception of Stroke: A Population-Based Survey in Uganda. *ISRN Stroke* 2014;**2014**
30. Hickey A OHA, McGee H, Donnellan C, Shelley E, Horgan F, O'Neill D. Stroke awareness in the general population: knowledge of stroke risk factors and warning signs in older adults. *BMC Geriatr* 2009;**9**:35
31. Akiyama H HY. Knowledge of transient ischemic attack among the Japanese. *J Stroke Cerebrovasc Dis*

1  
2  
3  
4  
5  
6  
7  
8  
9  
10  
11  
12  
13  
14  
15  
16  
17  
18  
19  
20  
21  
22  
23  
24  
25  
26  
27  
28  
29  
30  
31  
32  
33  
34  
35  
36  
37  
38  
39  
40  
41  
42  
43  
44  
45  
46  
47  
48  
49  
50  
51  
52  
53  
54  
55  
56  
57  
58  
59  
60

1                   2013;**22**(4):457-64  
2                   32. Zeng Y HG, Yi GH, Huang YJ, Zhang QH, He LL. Knowledge of stroke warning signs and risk factors among  
3                   patients with previous stroke or TIA in China. J Clin Nurs 2012;**21**(19-20):2886-95  
4                   33. Hickey A HD, McGee H, Conroy R, Shelley E. Knowledge of stroke risk factors and warning signs in Ireland:  
5                   development and application of the Stroke Awareness Questionnaire (SAQ). Int J Stroke  
6                   2012;**7**(4):298-306  
7                   34. Hachinski V. World Stroke Day Proclamation. stroke 2008;**39**:2409-20  
8                   35. Tsai PC YP, Tai JJ, Lou MF. Needs of family caregivers of stroke patients: a longitudinal study of caregivers'  
9                   perspectives. Patient Prefer Adherence 2015;**9**:449-57

For peer review only



1 AGE: EDUCATION:  
2  
3 ID: DIAGNOSIS: NIHSS SCORE:

4 The World Stroke Organization is making a Bill of Rights for stroke patients.  
5 It will help The Bill of Rights forms the basis to ensure that every patient  
6 has access to all elements of appropriate stroke care, to optimize their best  
7 chance of survival and recovery. The Stroke Bill of Rights was developed by  
8 a group of stroke survivors and caregivers from each region of the world.  
9 They need help to find out what are the most important things in their  
10 recovery. They will be very appreciated if you take 5-10 minutes to answer  
11 this survey. You need to finish all the 17 questions. This is for the patients,  
12 and the other is for the carers.

### 17 1. What is your age?

- 18  
19  18 - 29       50 - 59       80-89  
20  30 - 39       60 - 69       90-99  
21  40 - 49       70 - 79       above 100  
22  
23

### 24 2. What is your sex?

- 25  
26  male       female  
27  
28

### 29 3. How long has it been since you had your first stroke?

- 30  
31  Within 3 year     3-6 years     6-9 years     9-12 years     above 12  
32 years  
33  
34

### 35 4. I need for information about the signs of stroke.

- 36  
37  
38  very agree     agree     neutral     disagree     very disagree  
39  
40

### 41 5. I need for a rapid diagnosis so I can be treated quickly.

- 42  
43  very agree     agree     neutral     disagree     very disagree  
44  
45

### 46 6. I need for treatment by a specialized team at all stages 47 of my journey (in hospital and during rehabilitation)

- 48  
49  very agree     agree     neutral     disagree     very disagree  
50  
51  
52  
53

1 7. I need for informations about what has happened to me and  
2 about living with stroke fo as long as I require it.

3  very agree  agree  neutral  disagree  very disagree  
4  
5  
6

7 8. I have the right to be induced in all aspects of society  
8 regardless of any disability I may have.

9  very agree  agree  neutral  disagree  very disagree  
10  
11  
12

13 9. I need for psychological supports to provide hope for the  
14 best possible recovery I can make now and into the future.

15  very agree  agree  neutral  disagree  very disagree  
16  
17  
18

19 20 10. I need for considerate care.

21  very agree  agree  neutral  disagree  very disagree  
22  
23  
24

25 11. I need for Communications with other stroke suvivors and  
26 caregivers so I may gain and provide support in my recovery  
27 from stroke.

28  very agree  agree  neutral  disagree  very disagree  
29  
30  
31  
32

33 12. I have the right receive psychological and emotional  
34 support in a form that best meets my needs.

35  very agree  agree  neutral  disagree  very disagree  
36  
37  
38

39 13. I need for treatment that is right for me as an  
40 individual considering my age, gender, culture, goals and my  
41 changing needs over time.

42  very agree  agree  neutral  disagree  very disagree  
43  
44  
45  
46

47 14. I need for support(financial or otherwise) to ensure I am  
48 cared for in the longer term.

49  very agree  agree  neutral  disagree  very disagree  
50  
51  
52  
53

1 15. I need for support to return to work and/or to other  
2 activities I may choose to participate in after my stroke.  
3

4  very agree  agree  neutral  disagree  very disagree  
5  
6

7 16. I need for treatment regardless of financial situation,  
8 gender, culture or place that I live.  
9

10  very agree  agree  neutral  disagree  very disagree  
11  
12

13 17. I need for formal and informal advocacy to assist me with  
14 access to the services I need.  
15

16  very agree  agree  neutral  disagree  very disagree  
17  
18  
19  
20  
21  
22  
23  
24  
25  
26  
27  
28  
29  
30  
31  
32  
33  
34  
35  
36  
37  
38  
39  
40  
41  
42  
43  
44  
45  
46  
47  
48  
49  
50  
51  
52  
53  
54  
55  
56  
57

STROBE Statement—Checklist of items that should be included in reports of *cross-sectional studies*

|                              | Item No | Recommendation                                                                                                                                                                                    |                                                   |
|------------------------------|---------|---------------------------------------------------------------------------------------------------------------------------------------------------------------------------------------------------|---------------------------------------------------|
| <b>Title and abstract</b>    | 1       | (a) Indicate the study's design with a commonly used term in the title or the abstract                                                                                                            | page 1, lines 2–3                                 |
|                              |         | (b) Provide in the abstract an informative and balanced summary of what was done and what was found                                                                                               | page 2                                            |
| <b>Introduction</b>          |         |                                                                                                                                                                                                   |                                                   |
| Background/rationale         | 2       | Explain the scientific background and rationale for the investigation being reported                                                                                                              | page 4, lines 1–10                                |
| Objectives                   | 3       | State specific objectives, including any prespecified hypotheses                                                                                                                                  | page 4, lines 13–16                               |
| <b>Methods</b>               |         |                                                                                                                                                                                                   |                                                   |
| Study design                 | 4       | Present key elements of study design early in the paper                                                                                                                                           | page 5, lines 13–15                               |
| Setting                      | 5       | Describe the setting, locations, and relevant dates, including periods of recruitment, exposure, follow-up, and data collection                                                                   | page 4, lines 22<br>page 5, lines 1–2             |
| Participants                 | 6       | (a) Give the eligibility criteria, and the sources and methods of selection of participants                                                                                                       | page 5, lines 4–11                                |
| Variables                    | 7       | Clearly define all outcomes, exposures, predictors, potential confounders, and effect modifiers. Give diagnostic criteria, if applicable                                                          | page 5, lines 16–22                               |
| Data sources/<br>measurement | 8*      | For each variable of interest, give sources of data and details of methods of assessment (measurement). Describe comparability of assessment methods if there is more than one group              | NA                                                |
| Bias                         | 9       | Describe any efforts to address potential sources of bias                                                                                                                                         | page 5, lines 10–11<br>page 5, lines 13–15        |
| Study size                   | 10      | Explain how the study size was arrived at                                                                                                                                                         | page 5, lines 2–4                                 |
| Quantitative<br>variables    | 11      | Explain how quantitative variables were handled in the analyses. If applicable, describe which groupings were chosen and why                                                                      | page 6, lines 1–6                                 |
| Statistical methods          | 12      | (a) Describe all statistical methods, including those used to control for confounding                                                                                                             | page 6, lines 9–14                                |
|                              |         | (b) Describe any methods used to examine subgroups and interactions                                                                                                                               | page 6, lines 11–13                               |
|                              |         | (c) Explain how missing data were addressed                                                                                                                                                       | NA                                                |
|                              |         | (d) If applicable, describe analytical methods taking account of sampling strategy                                                                                                                | page 6, lines 12                                  |
|                              |         | (e) Describe any sensitivity analyses                                                                                                                                                             | page 6, lines 14                                  |
| <b>Results</b>               |         |                                                                                                                                                                                                   |                                                   |
| Participants                 | 13*     | (a) Report numbers of individuals at each stage of study—eg numbers potentially eligible, examined for eligibility, confirmed eligible, included in the study, completing follow-up, and analysed | page 6, lines 20–21                               |
|                              |         | (b) Give reasons for non-participation at each stage                                                                                                                                              | NA                                                |
|                              |         | (c) Consider use of a flow diagram                                                                                                                                                                | NA                                                |
| Descriptive data             | 14*     | (a) Give characteristics of study participants (eg demographic, clinical, social) and information on exposures and potential confounders                                                          | page 6, lines 18–22<br>page 7, lines 1<br>Table 1 |

|                          |     |                                                                                                                                                                                                              |                                                         |
|--------------------------|-----|--------------------------------------------------------------------------------------------------------------------------------------------------------------------------------------------------------------|---------------------------------------------------------|
|                          |     | (b) Indicate number of participants with missing data for each variable of interest                                                                                                                          | NA                                                      |
| Outcome data             | 15* | Report numbers of outcome events or summary measures                                                                                                                                                         | page 8, lines3–6                                        |
| Main results             | 16  | (a) Give unadjusted estimates and, if applicable, confounder-adjusted estimates and their precision (eg, 95% confidence interval). Make clear which confounders were adjusted for and why they were included | page 8, lines9                                          |
|                          |     | (b) Report category boundaries when continuous variables were categorized                                                                                                                                    | page 8, lines11<br>page 9, lines 1                      |
|                          |     | (c) If relevant, consider translating estimates of relative risk into absolute risk for a meaningful time period                                                                                             | NA                                                      |
| Other analyses           | 17  | Report other analyses done—eg analyses of subgroups and interactions, and sensitivity analyses                                                                                                               | page 9, lines2–4                                        |
| <b>Discussion</b>        |     |                                                                                                                                                                                                              |                                                         |
| Key results              | 18  | Summarise key results with reference to study objectives                                                                                                                                                     | page 10, lines13–22<br>page 11–14<br>page 15, lines1–11 |
| Limitations              | 19  | Discuss limitations of the study, taking into account sources of potential bias or imprecision. Discuss both direction and magnitude of any potential bias                                                   | page 15, lines13–21                                     |
| Interpretation           | 20  | Give a cautious overall interpretation of results considering objectives, limitations, multiplicity of analyses, results from similar studies, and other relevant evidence                                   | page 16, lines1–6                                       |
| Generalisability         | 21  | Discuss the generalisability (external validity) of the study results                                                                                                                                        | page 16, lines6–8                                       |
| <b>Other information</b> |     |                                                                                                                                                                                                              |                                                         |
| Funding                  | 22  | Give the source of funding and the role of the funders for the present study and, if applicable, for the original study on which the present article is based                                                | page 17, lines1–3                                       |

\*Give information separately for exposed and unexposed groups.

**Note:** An Explanation and Elaboration article discusses each checklist item and gives methodological background and published examples of transparent reporting. The STROBE checklist is best used in conjunction with this article (freely available on the Web sites of PLoS Medicine at <http://www.plosmedicine.org/>, Annals of Internal Medicine at <http://www.annals.org/>, and Epidemiology at <http://www.epidem.com/>). Information on the STROBE Initiative is available at [www.strobe-statement.org](http://www.strobe-statement.org).
