# Supplementary material for: Needs and rights awareness of stroke survivors and caregivers: a cross-sectional, single-centre questionnaire survey
Source: PubMed Central journal article supplement — BMJ Open. 2017 Oct 5;7(10):e013210. doi: 10.1136/bmjopen-2016-013210 (PMC5640053; doi:10.1136/bmjopen-2016-013210), 2017-10-05
Supplement: bmjopen-2016-013210supp001.pdf [file bmjopen-2016-013210supp001.pdf]

AGE:

EDUCATION:

ID:

DIAGNOSIS:

NIHSS SCORE:

The World Stroke Organization is making a Bill of Rights for stroke patients. It will help The Bill of Rights forms the basis to ensure that every patient has access to all elements of appropriate stroke care, to optimize their best chance of survival and recovery. The Stroke Bill of Rights was developed by a group of stroke survivors and caregivers from each region of the world. They need help to find out what are the most important things in their recovery. They will be very appreciated if you take 5-10 minutes to answer this survey. You need to finish all the 17 questions. This is for the patients, and the other is for the carers.

### 1. What is your age?

18 - 29

30 - 39

40 - 49

50 - 59

60 - 69

70 - 79

80-89

90-99

above 100

### 2. What is your sex?

male

female

### 3. How long has it been since you had your first stroke?

Within 3 year

3-6 years

6-9 years

9-12 years

above 12

years

### 4. I need for information about the signs of stroke.

very agree

agree

neutral

disagree

very disagree

### 5. I need for a rapid diagnosis so I can be treated quickly.

very agree

agree

neutral

disagree

very disagree

### 6. I need for treatment by a specialized team at all atages of my journey (in hospital an during rehabilitation)

very agree

agree

neutral

disagree

very disagree

**7. I need for informations about what has happened to me and about living with stroke fo as long as I require it.**

very agree    agree    neutral    disagree    very disagree

**8. I have the right to be induced in all aspects of society regardless of any disability I may have.**

very agree    agree    neutral    disagree    very disagree

**9. I need for psychological supports to provide hope for the best possible recovery I can make now and into the future.**

very agree    agree    neutral    disagree    very disagree

**10. I need for considerate care.**

very agree    agree    neutral    disagree    very disagree

**11. I need for Communications with other stroke suvivors and caregivers so I may gain and provide support in my recovery from stroke.**

very agree    agree    neutral    disagree    very disagree

**12. I have the right receive psychological and emotional support in a form that best meets my needs.**

very agree    agree    neutral    disagree    very disagree

**13. I need for treatment that is right for me as an individual considering my age, gender, culture, goals and my changing needs over time.**

very agree    agree    neutral    disagree    very disagree

**14. I need for support(financial or otherwise) to ensure I am cared for in the longer term.**

very agree    agree    neutral    disagree    very disagree

**15. I need for support to return to work and/or to other activities I may choose to participate in after my stroke.**

very agree    agree    neutral    disagree    very disagree

**16. I need for treatment regardless of financial situation, gender, culture or place that I live.**

very agree    agree    neutral    disagree    very disagree

**17. I need for formal and informal advocacy to assist me with access to the services I need.**

very agree    agree    neutral    disagree    very disagree
